# Supplementary material for: Bis-cationic ionic liquid crystals
Source: Royal Society of Chemistry journal article supplement (doi:10.1039/c3tc31368a), 2013-09-23

# TG

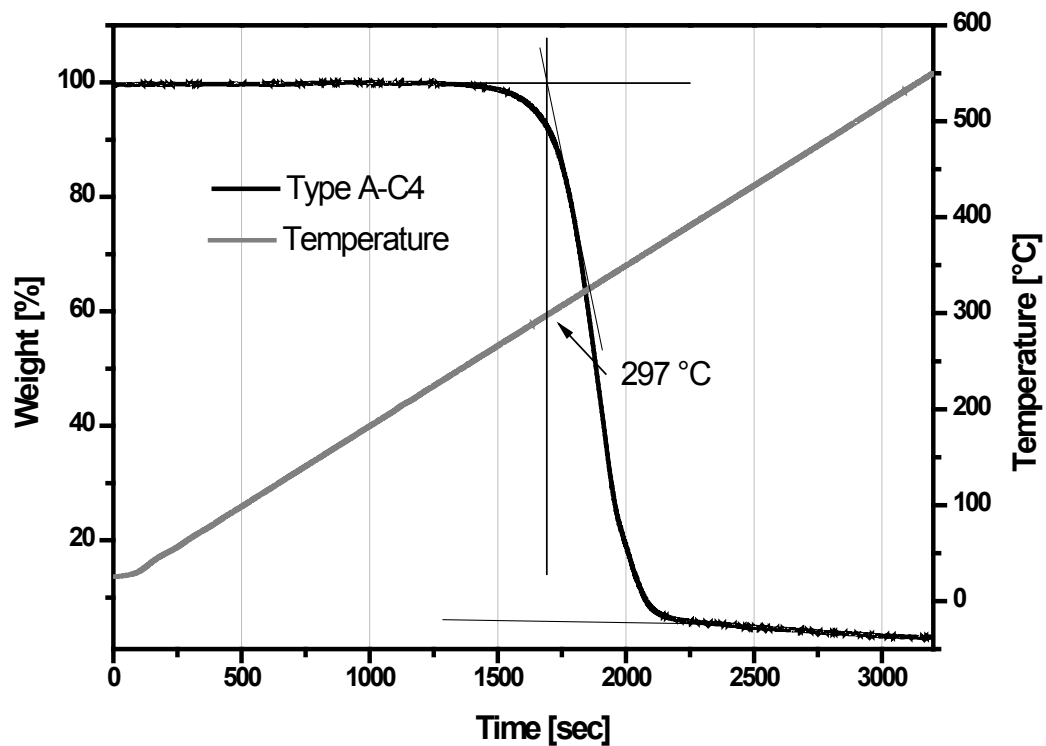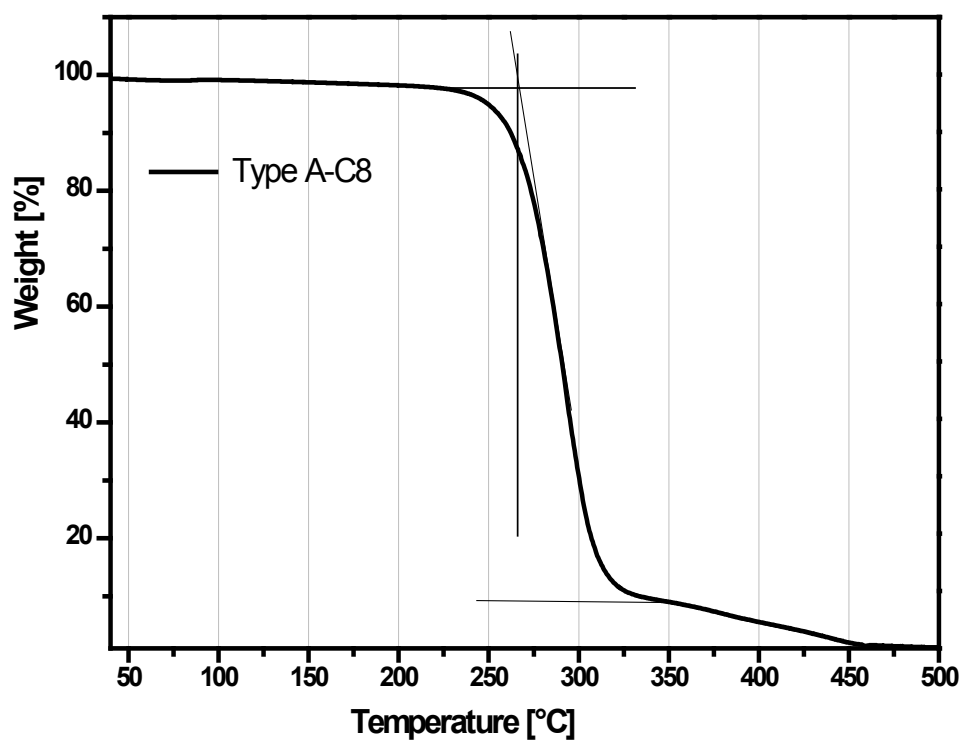

Electronic Supporting Information – Bis-cationic ionic liquid crystals – Yang, Stappert, Mudring

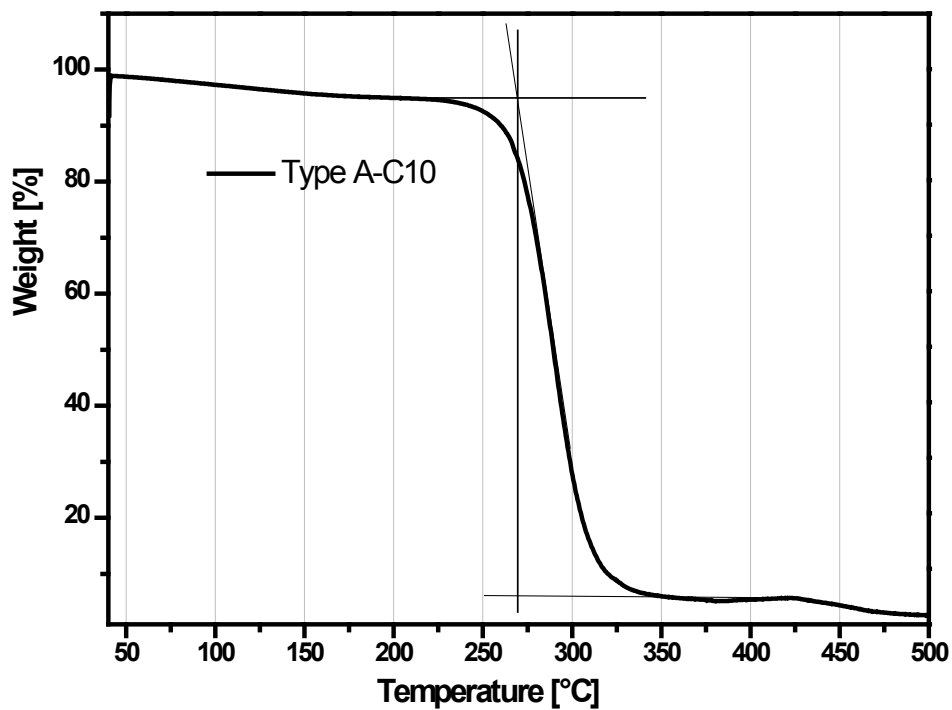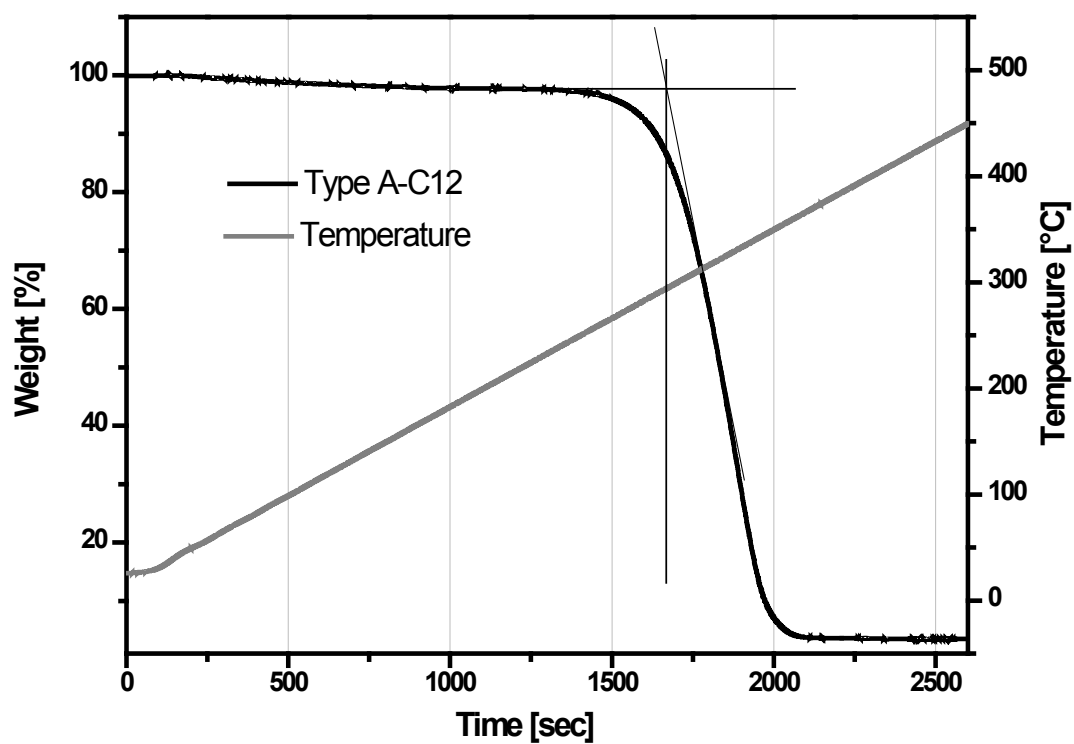

Electronic Supporting Information – Bis-cationic ionic liquid crystals – Yang, Stappert, Mudring

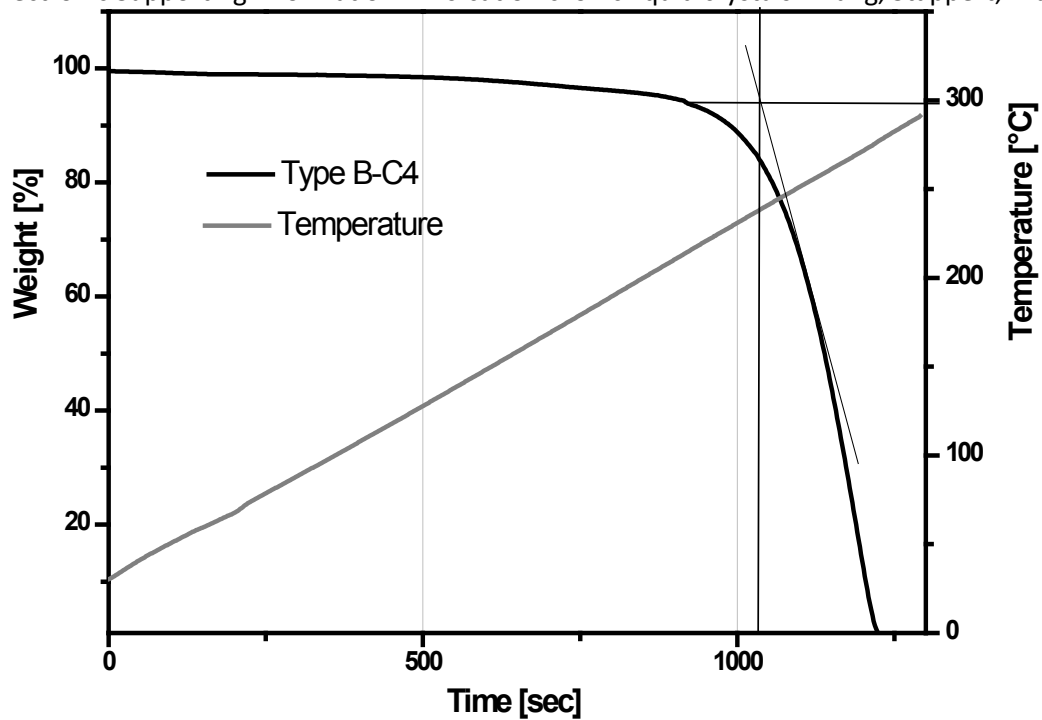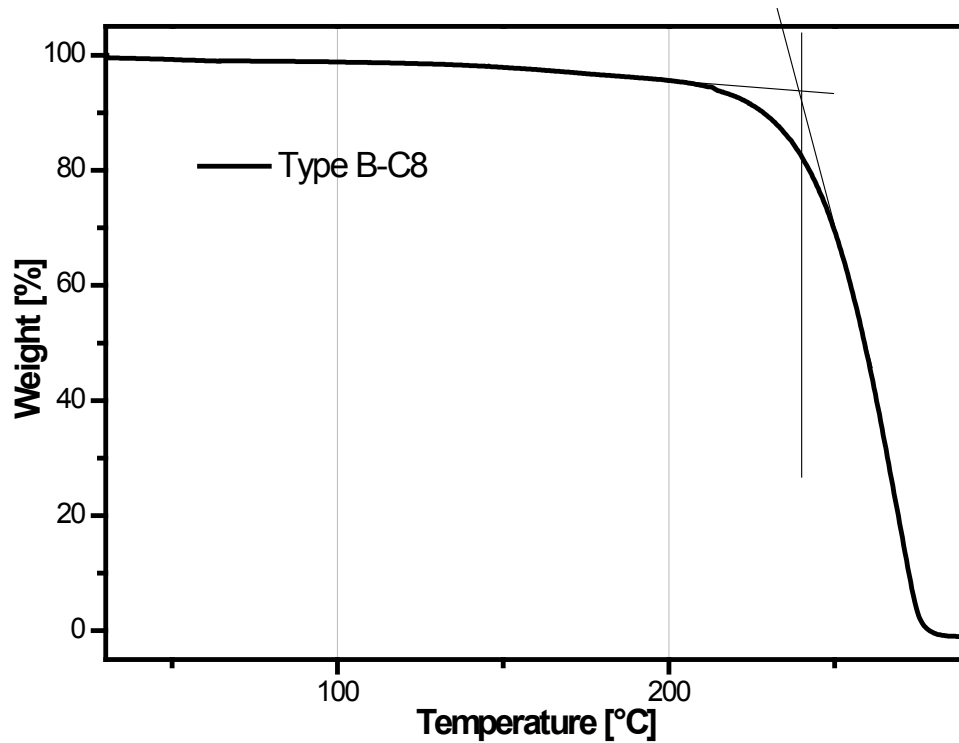

Electronic Supporting Information – Bis-cationic ionic liquid crystals – Yang, Stappert, Mudring

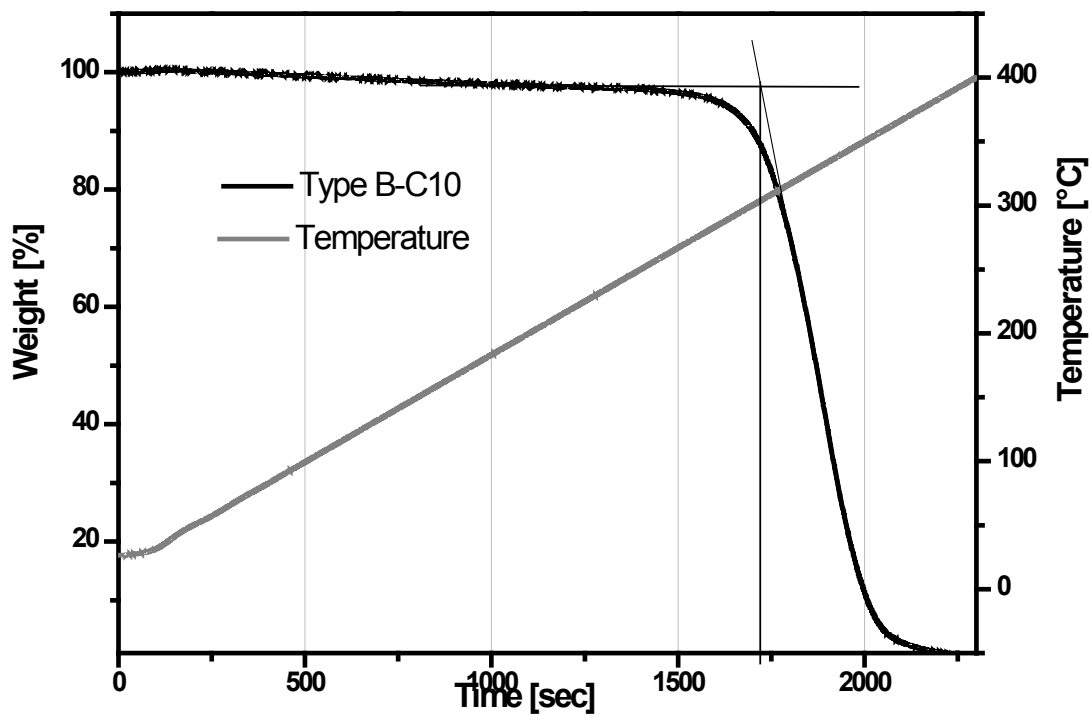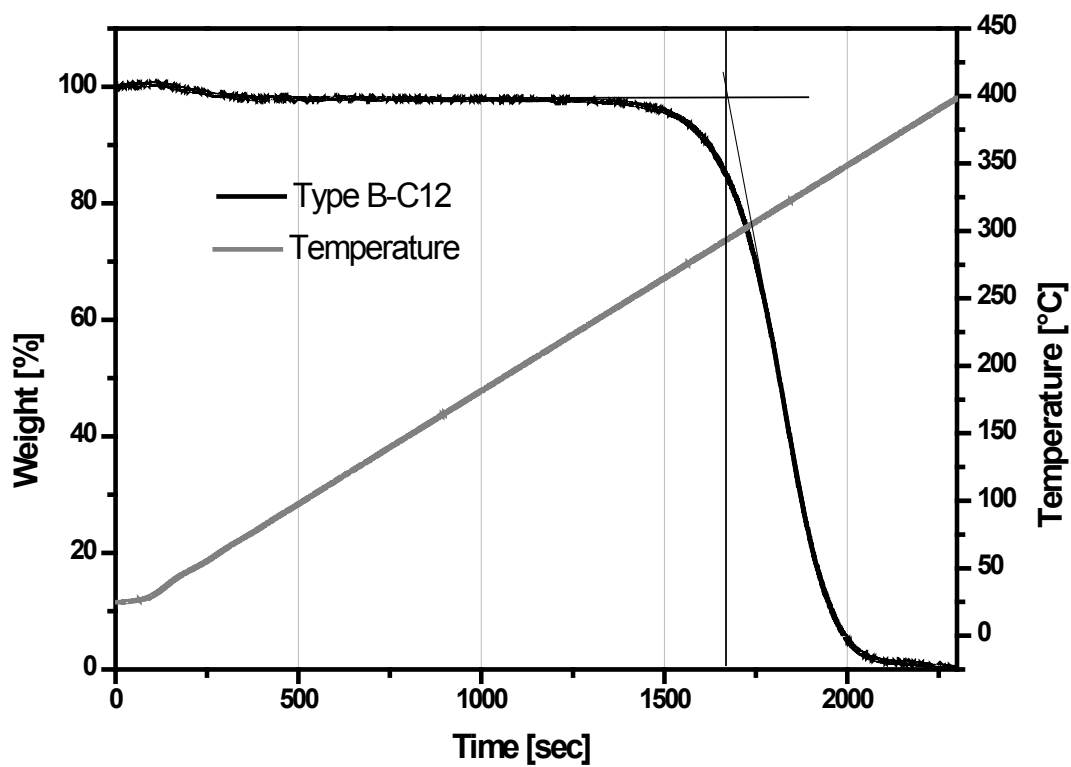

Electronic Supporting Information – Bis-cationic ionic liquid crystals – Yang, Stappert, Mudring

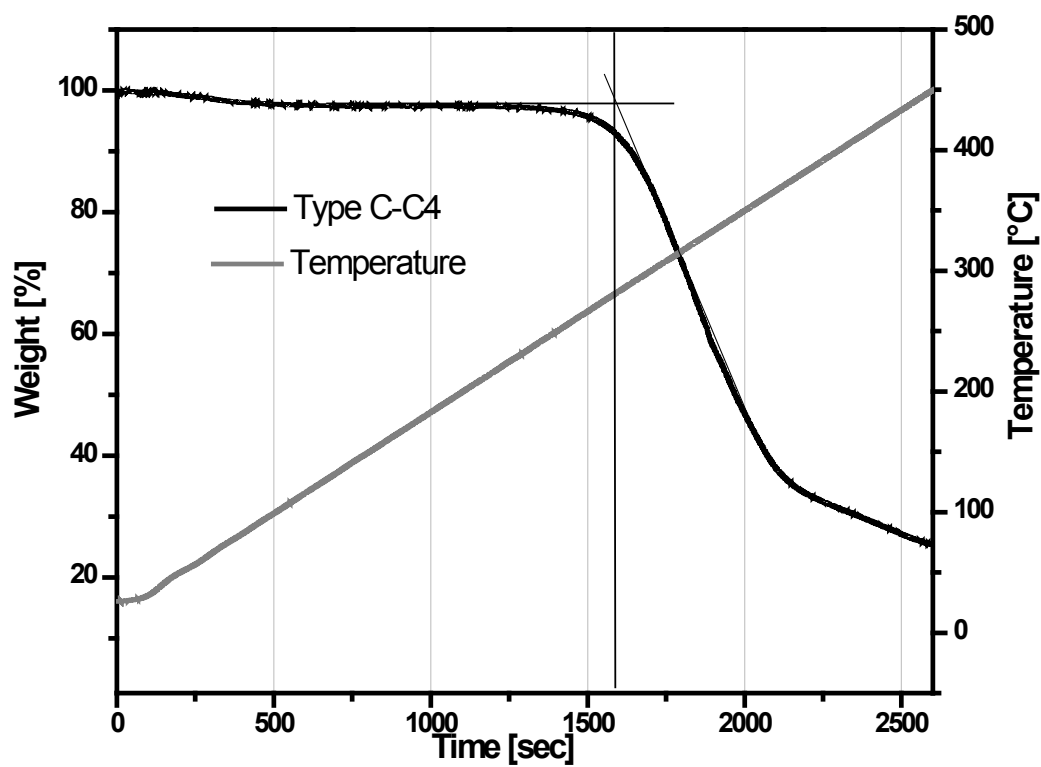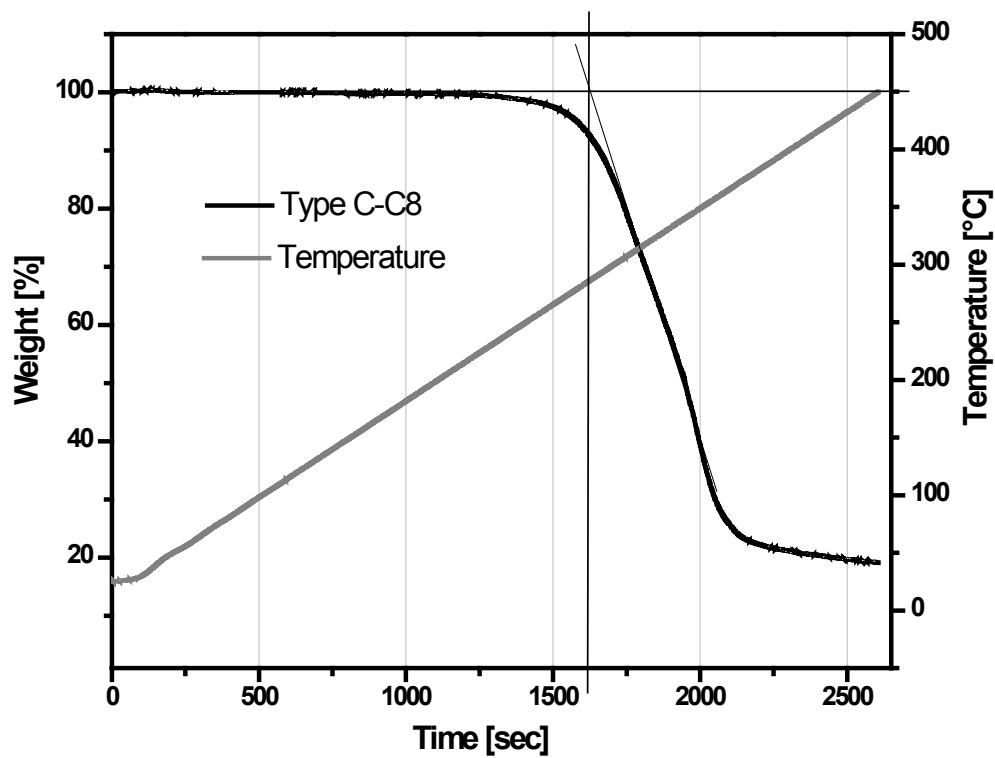

Electronic Supporting Information – Bis-cationic ionic liquid crystals – Yang, Stappert, Mudring

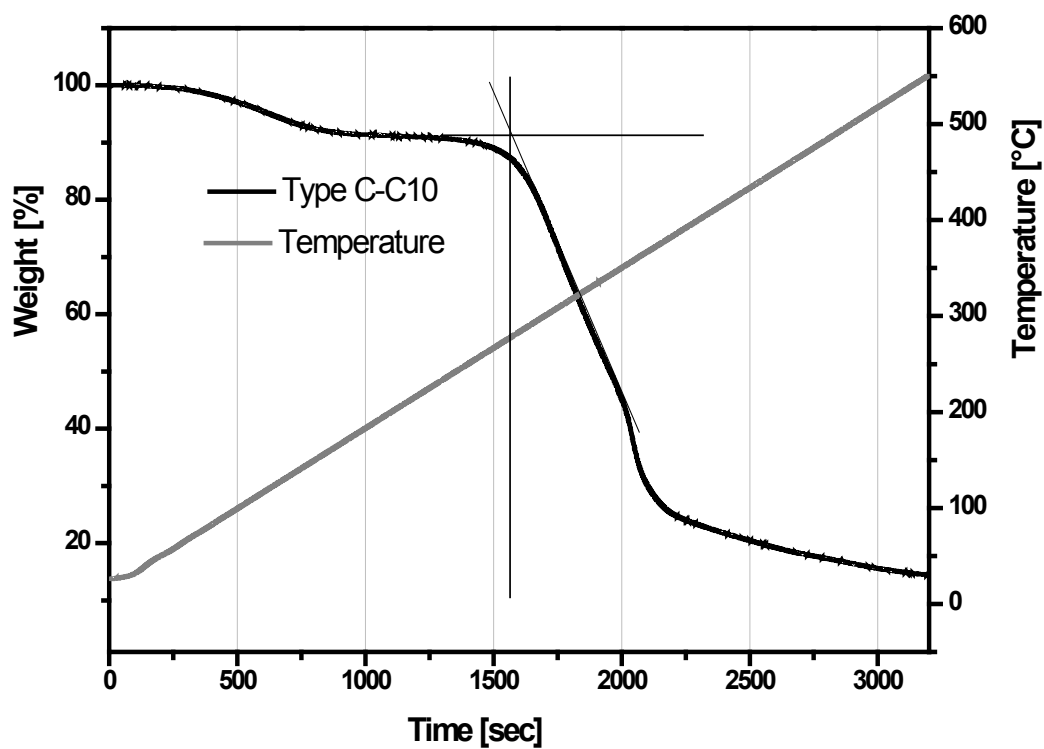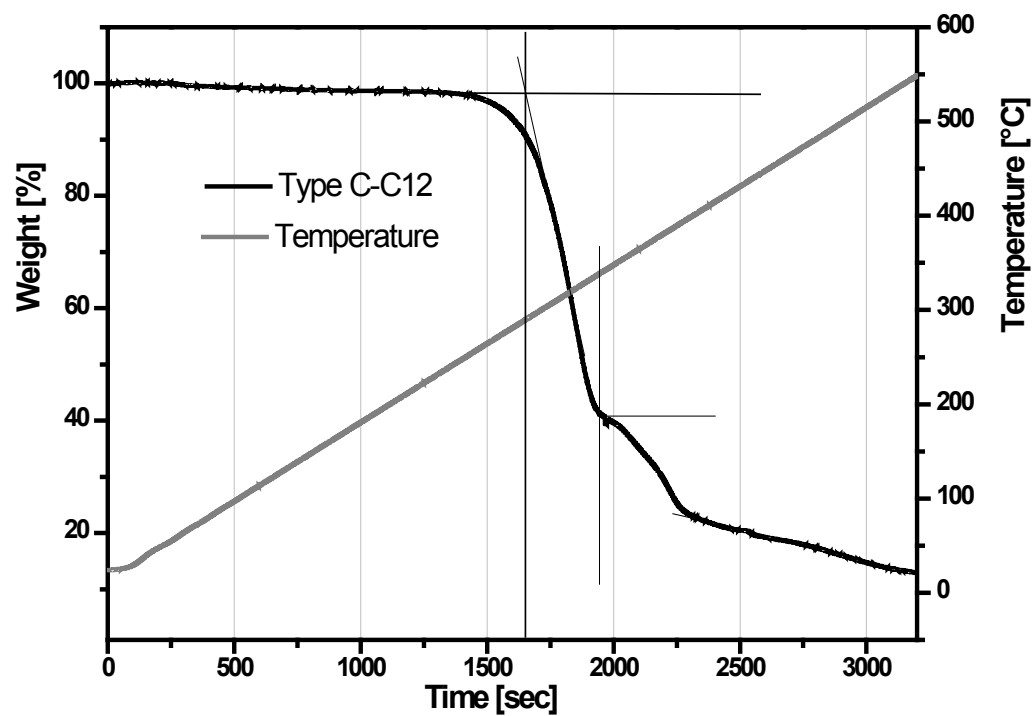

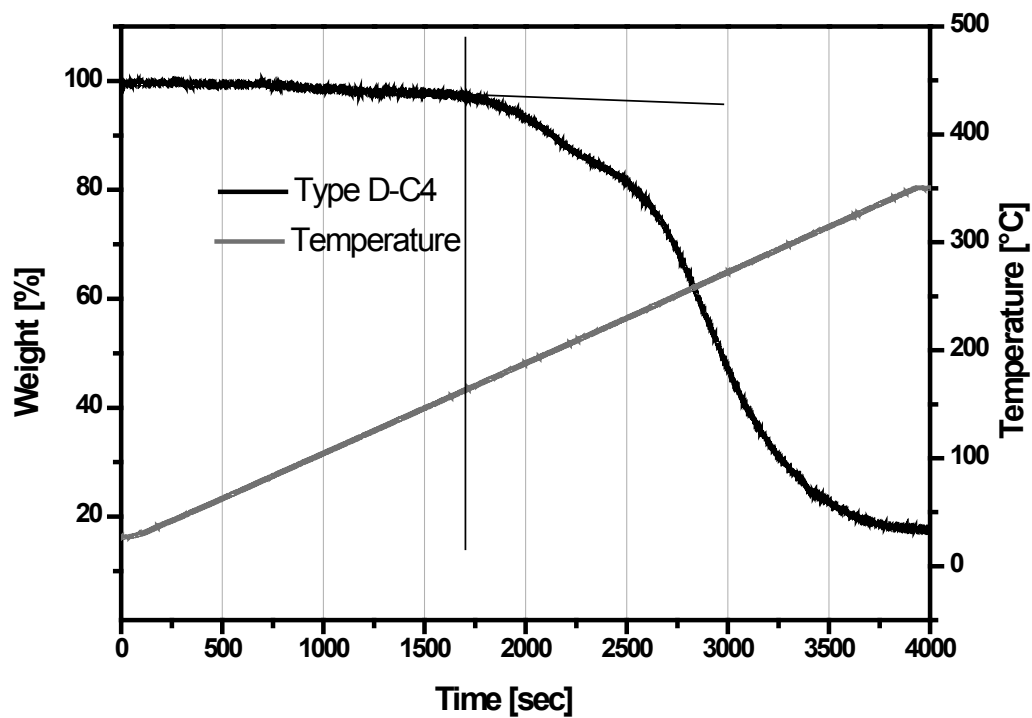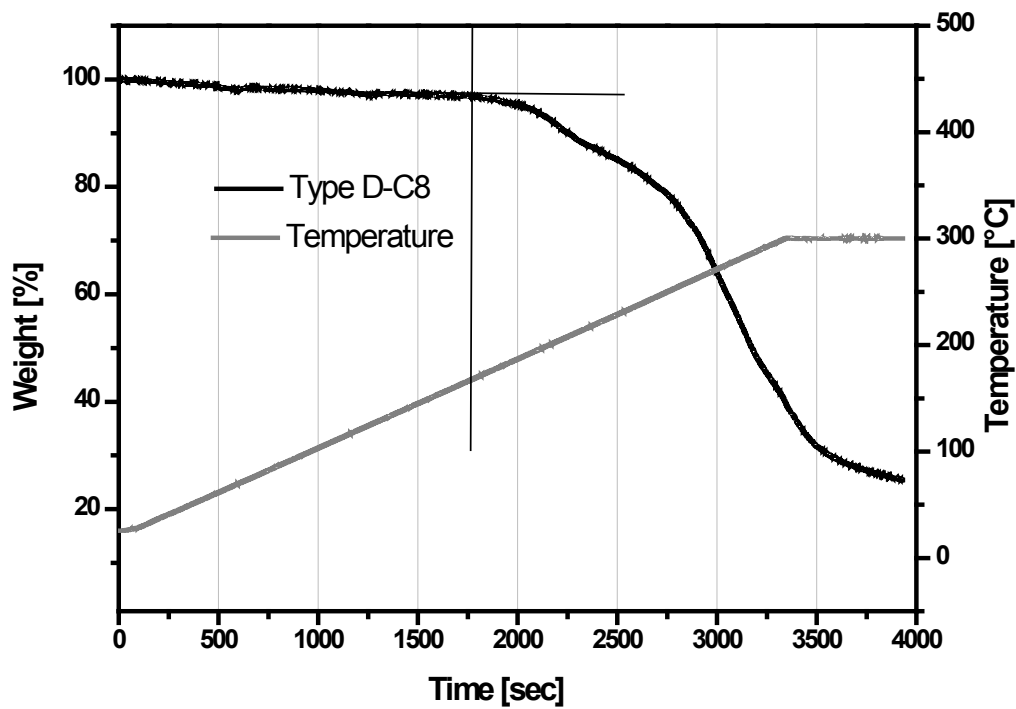

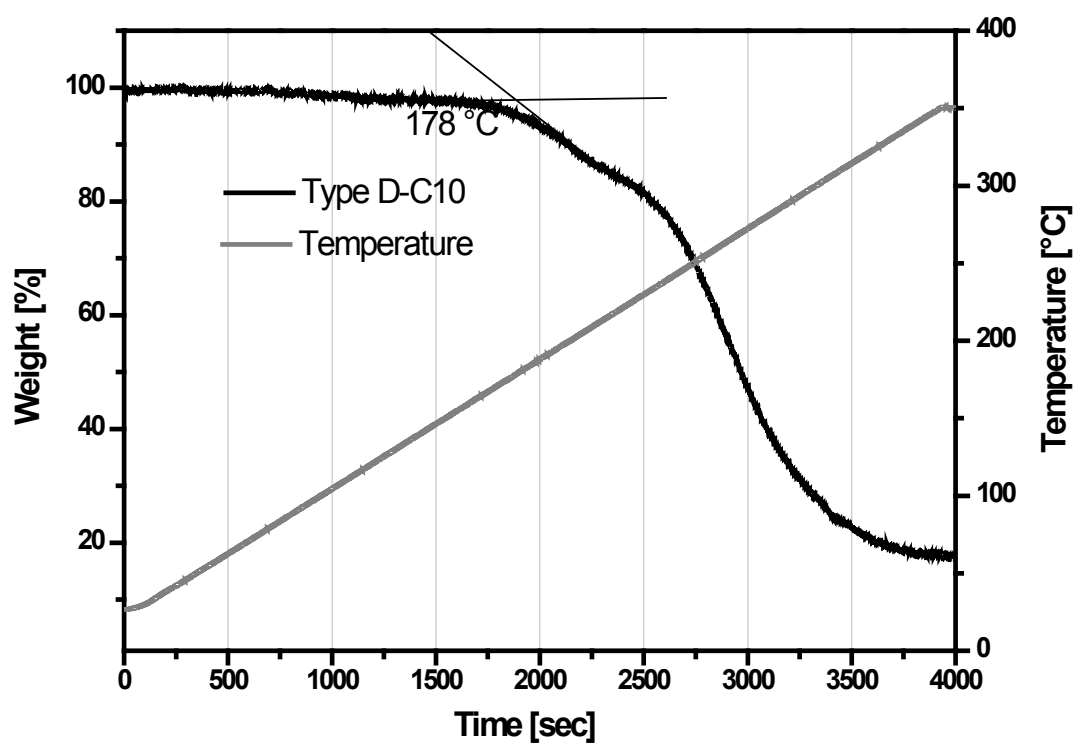



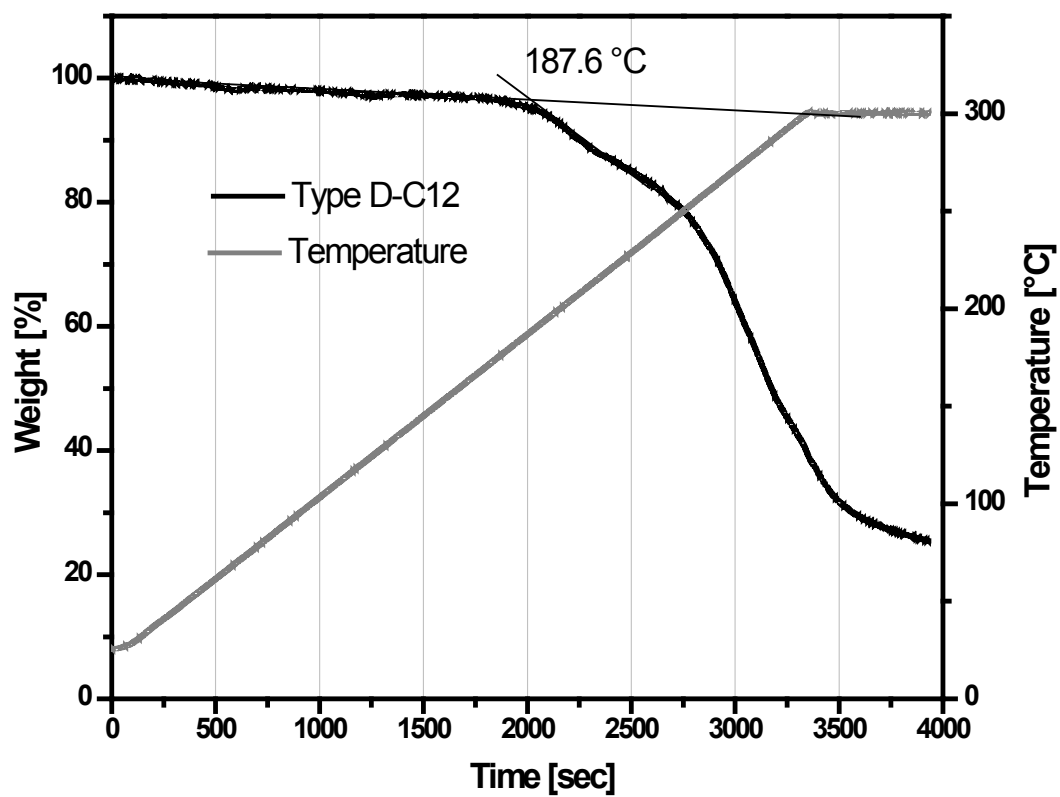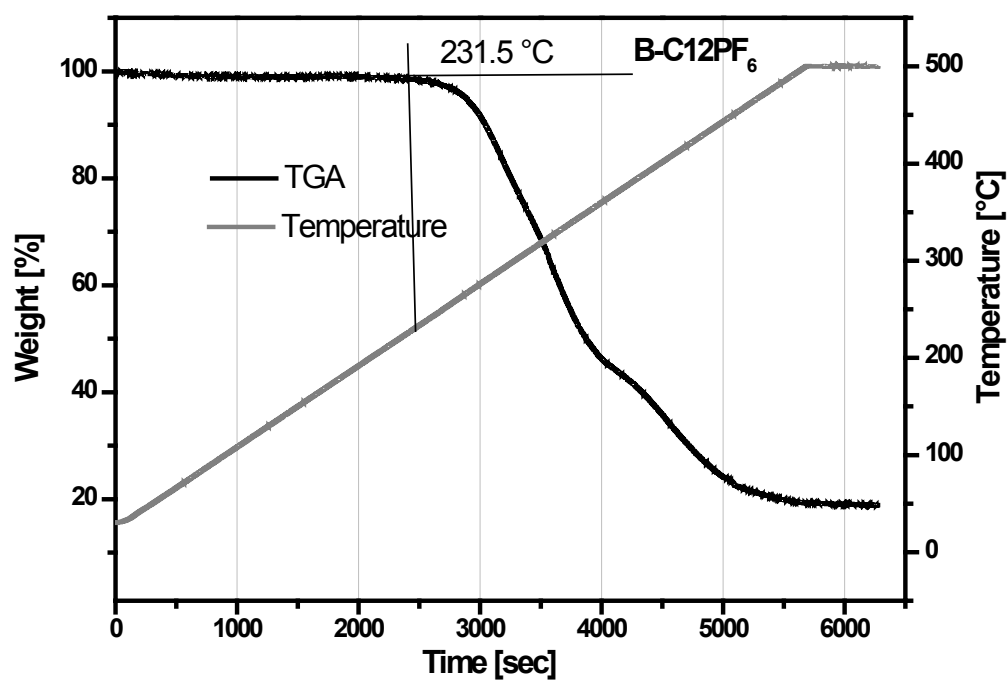

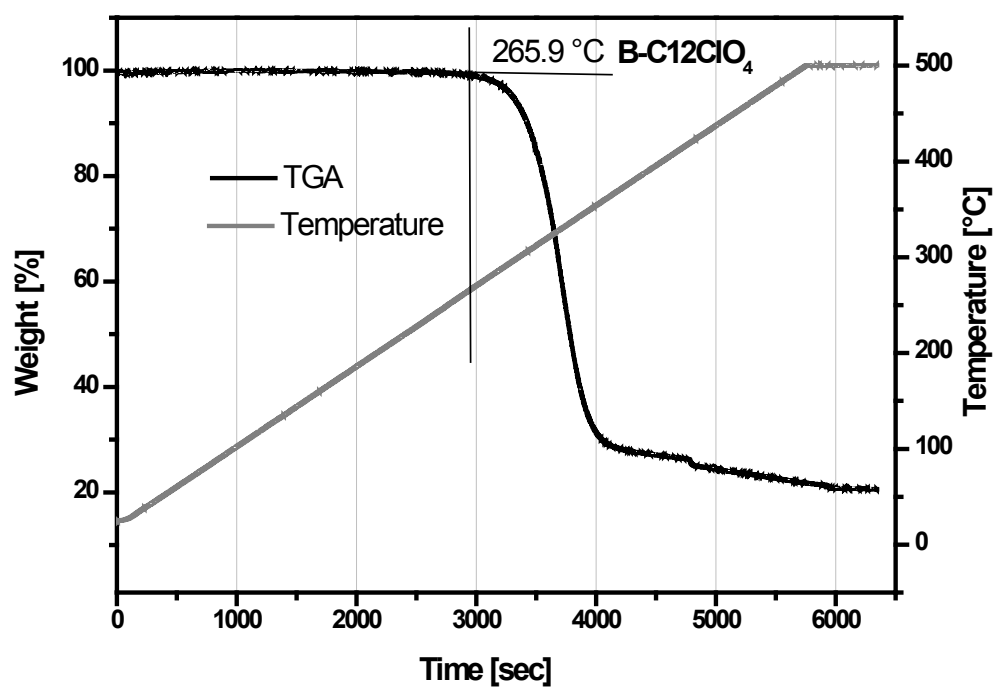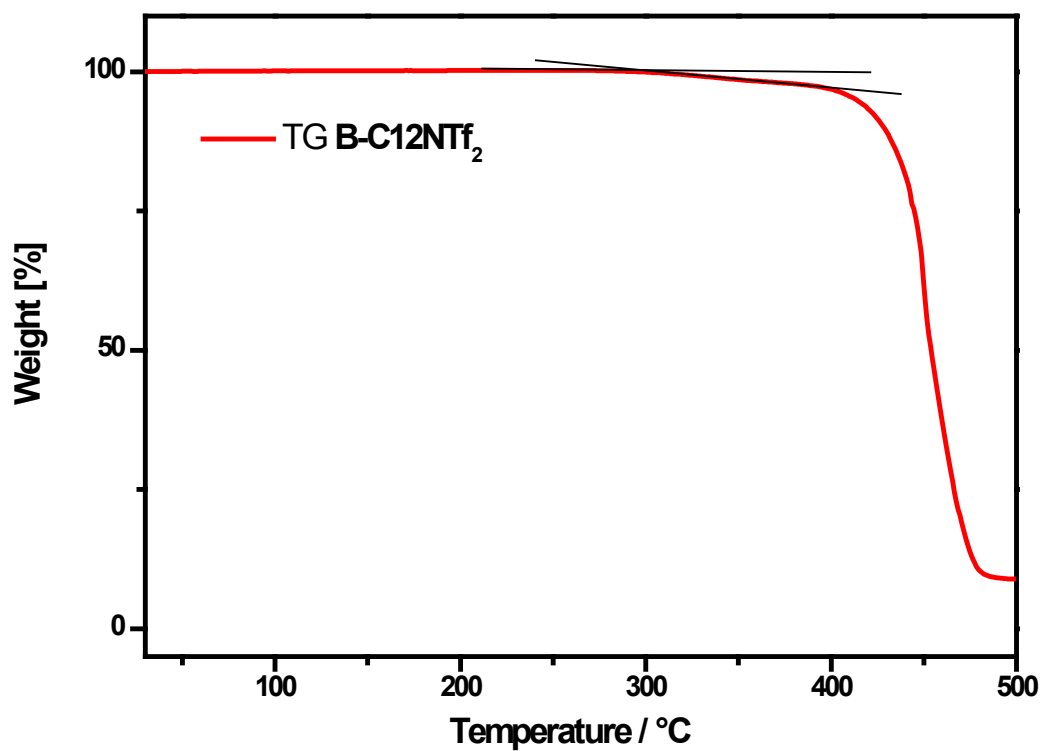

## DSC

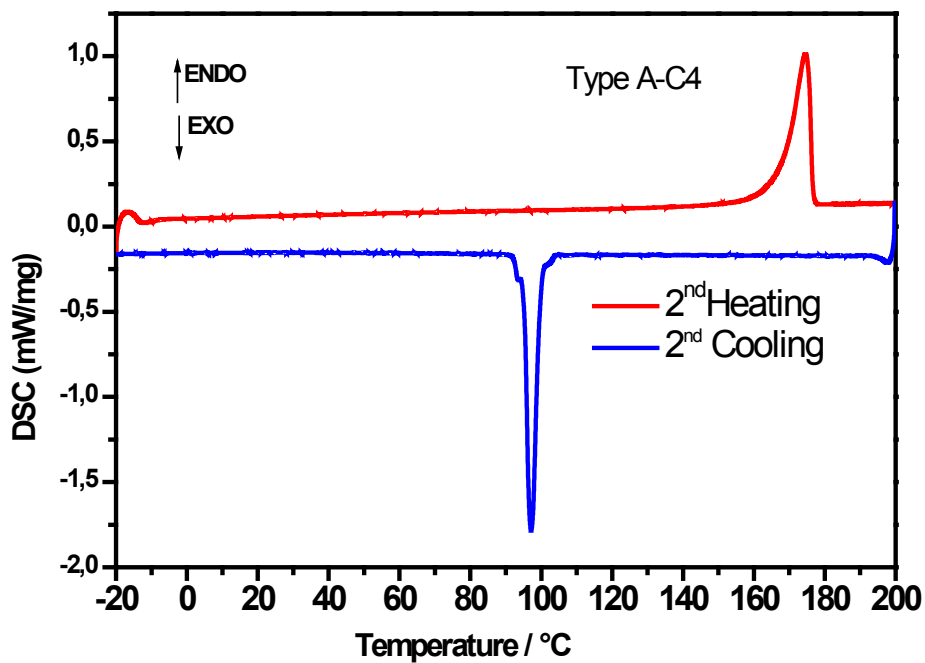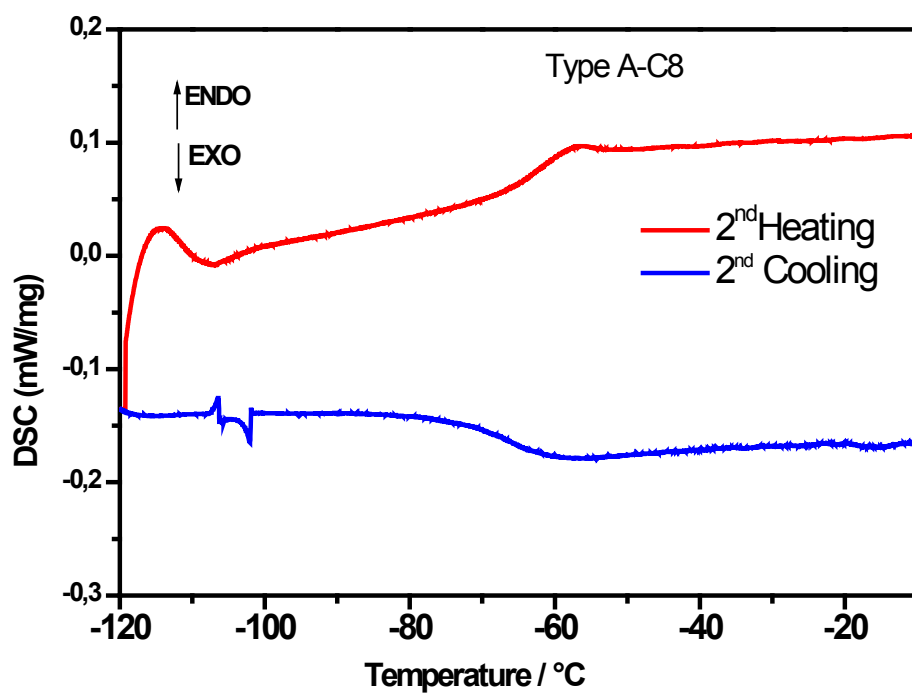

Electronic Supporting Information – Bis-cationic ionic liquid crystals – Yang, Stappert, Mudring

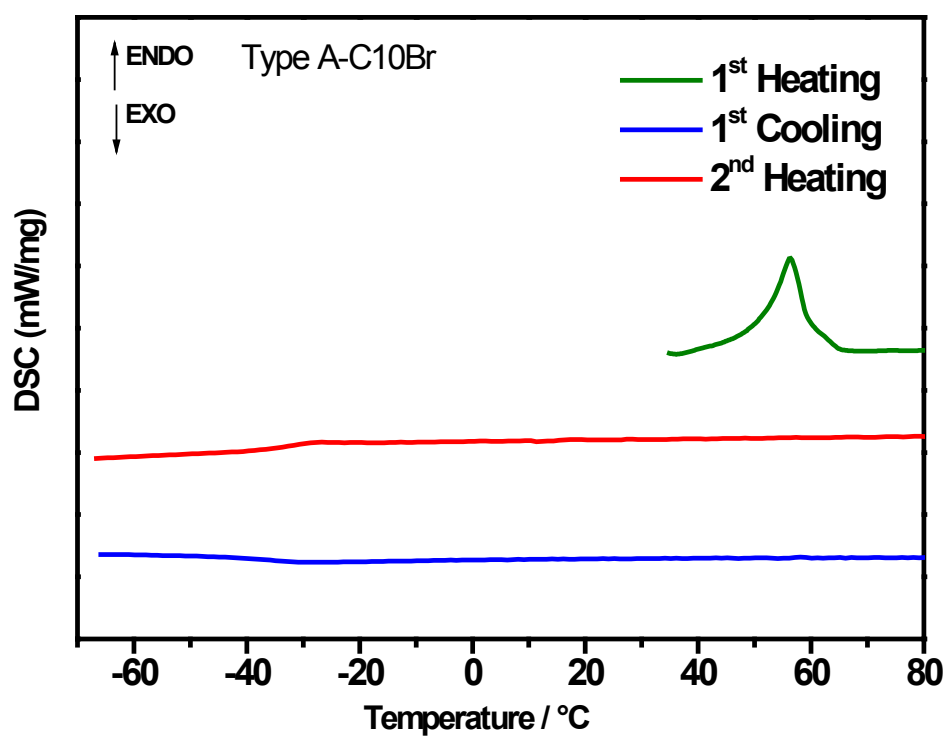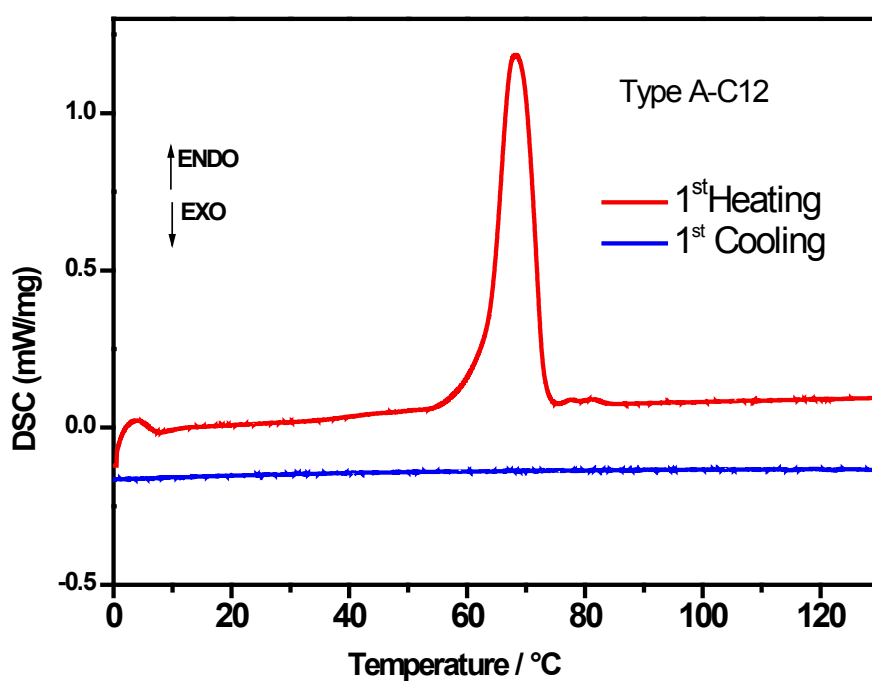

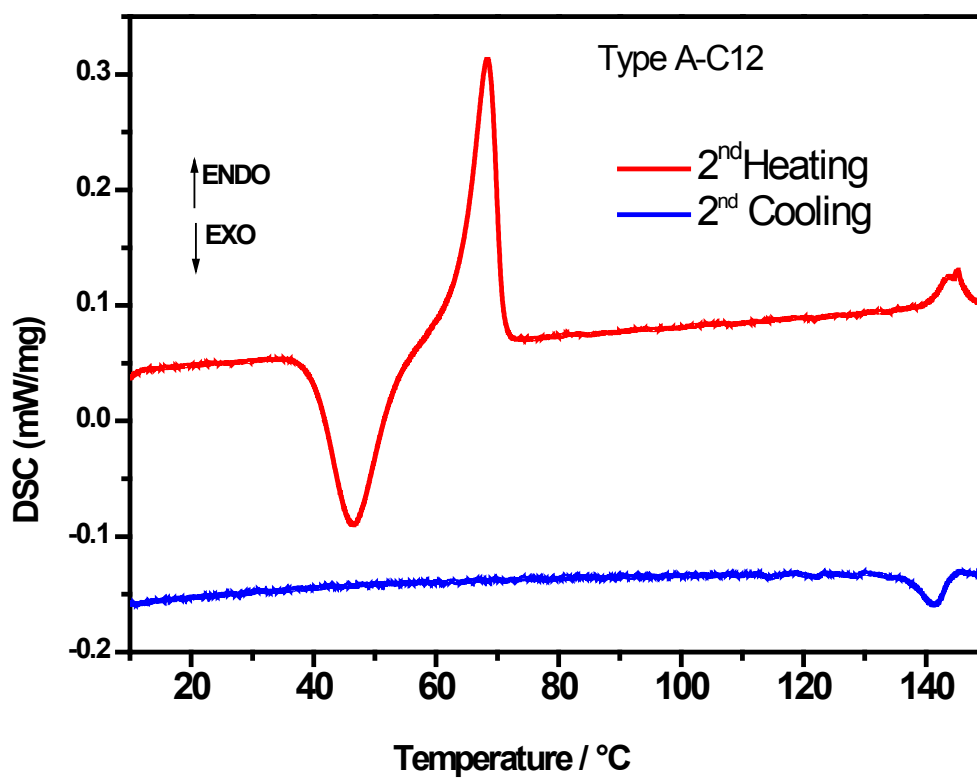

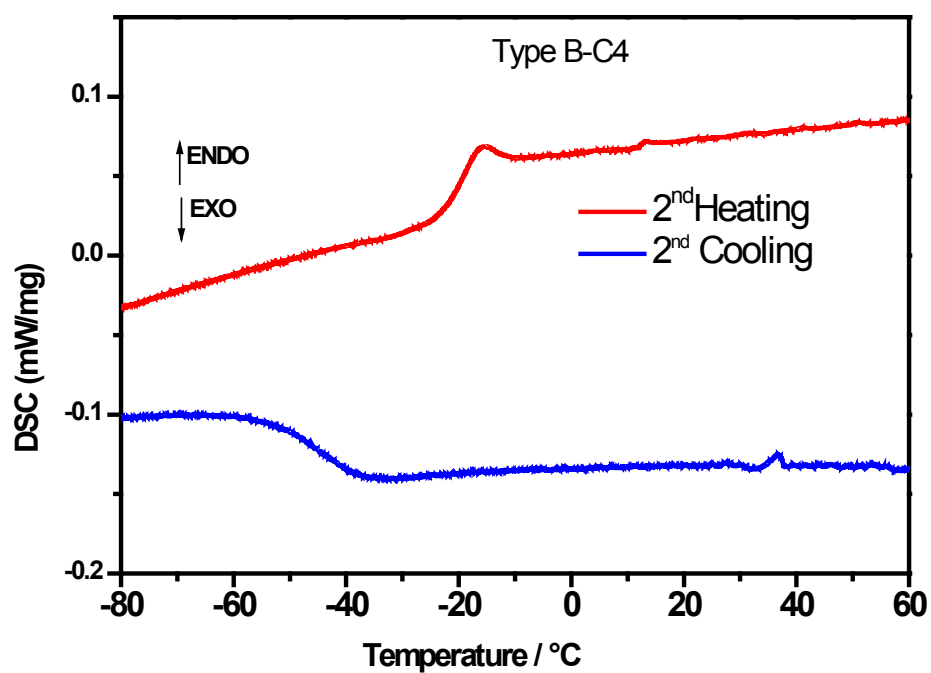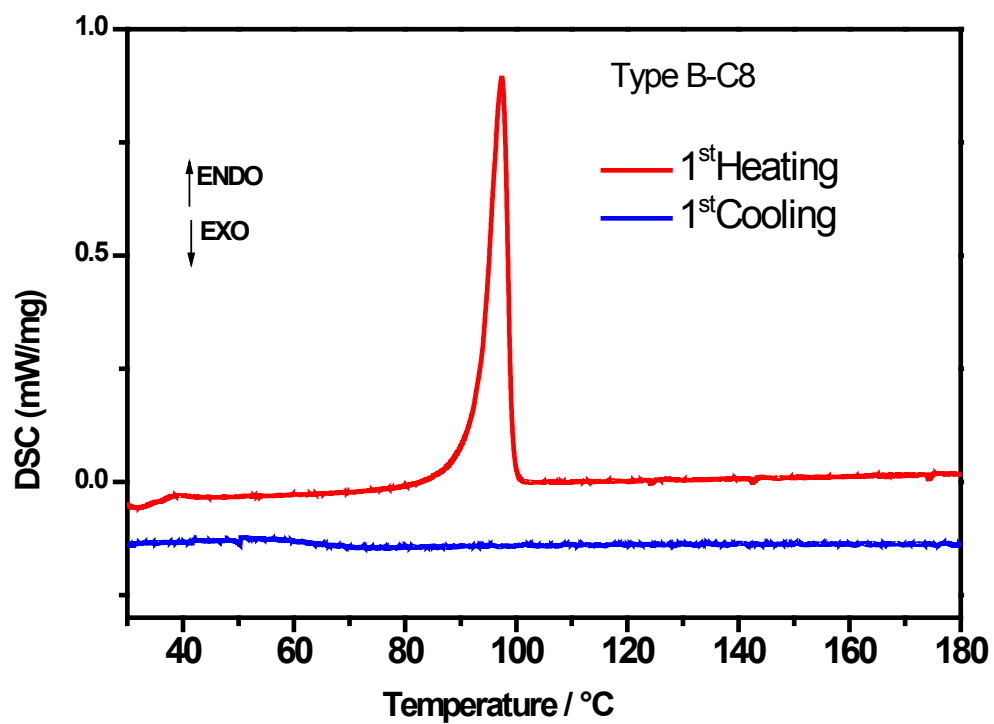

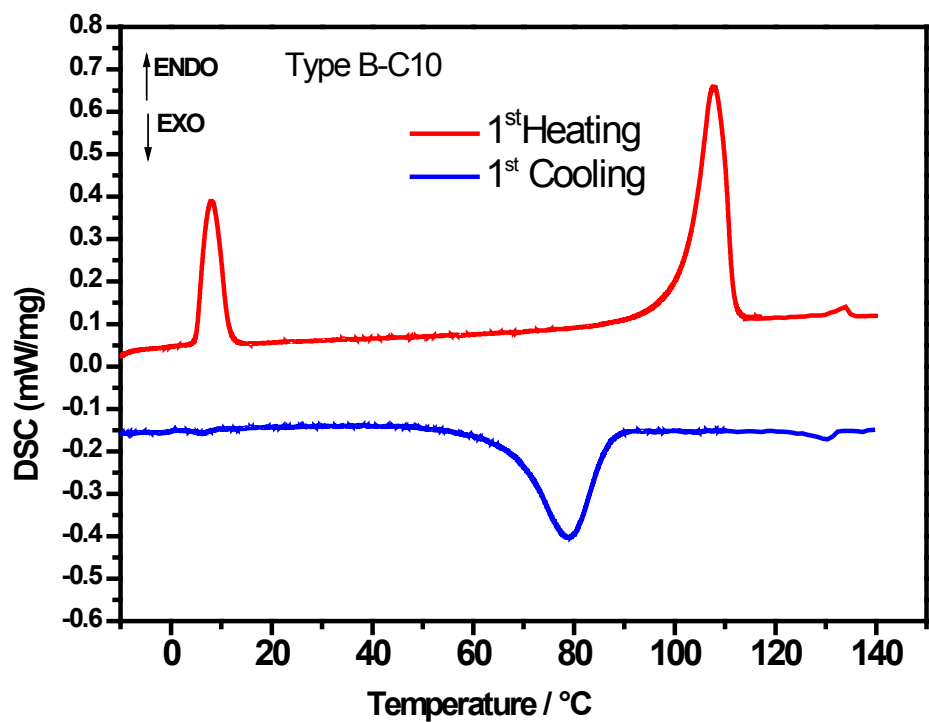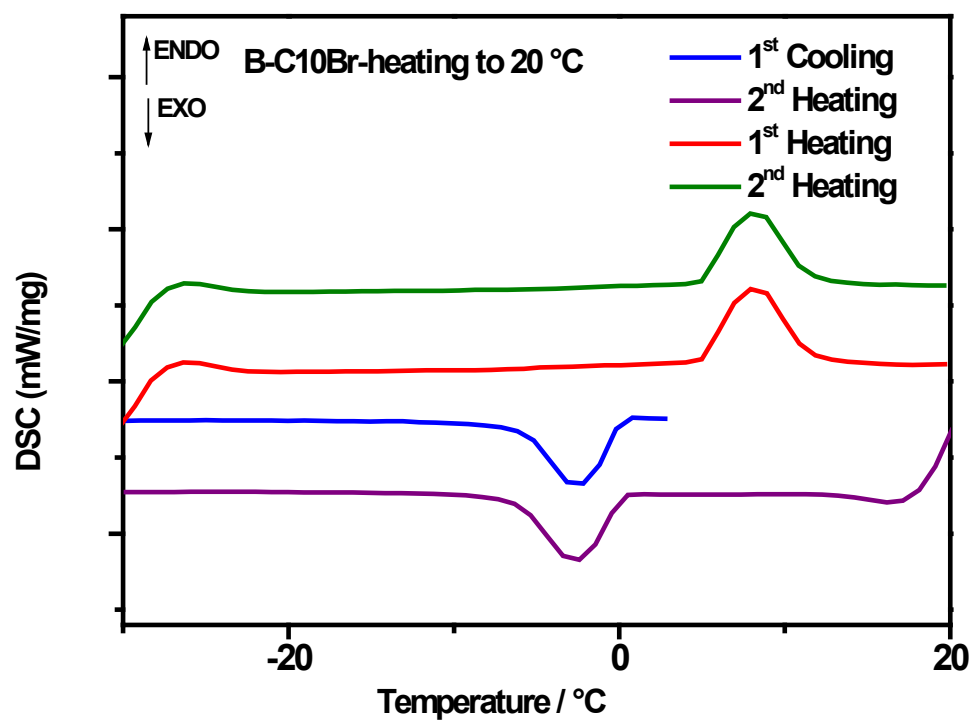

Electronic Supporting Information – Bis-cationic ionic liquid crystals – Yang, Stappert, Mudring

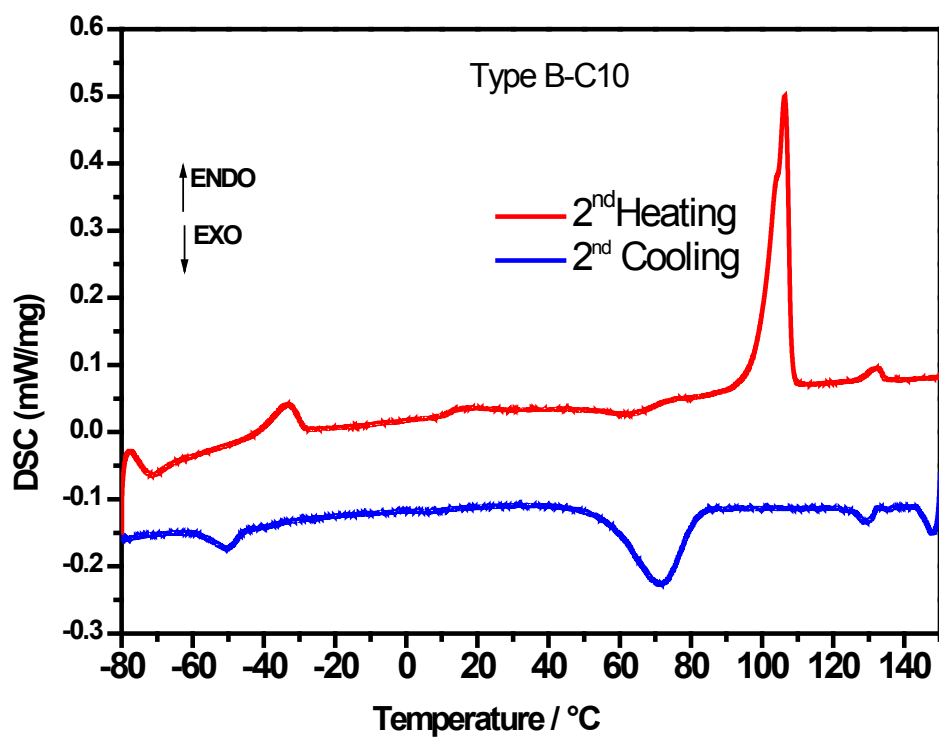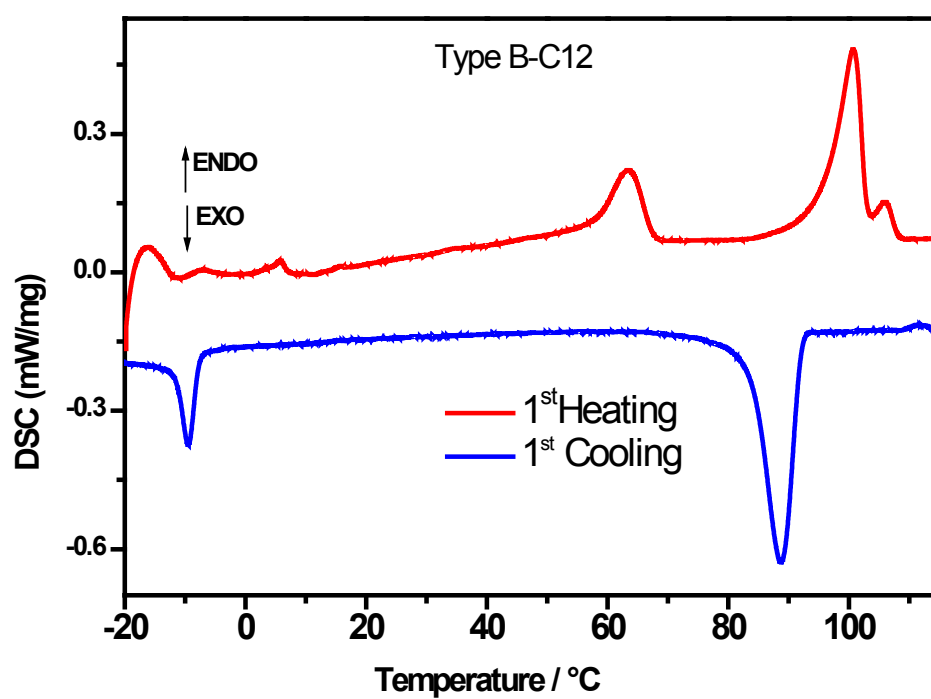



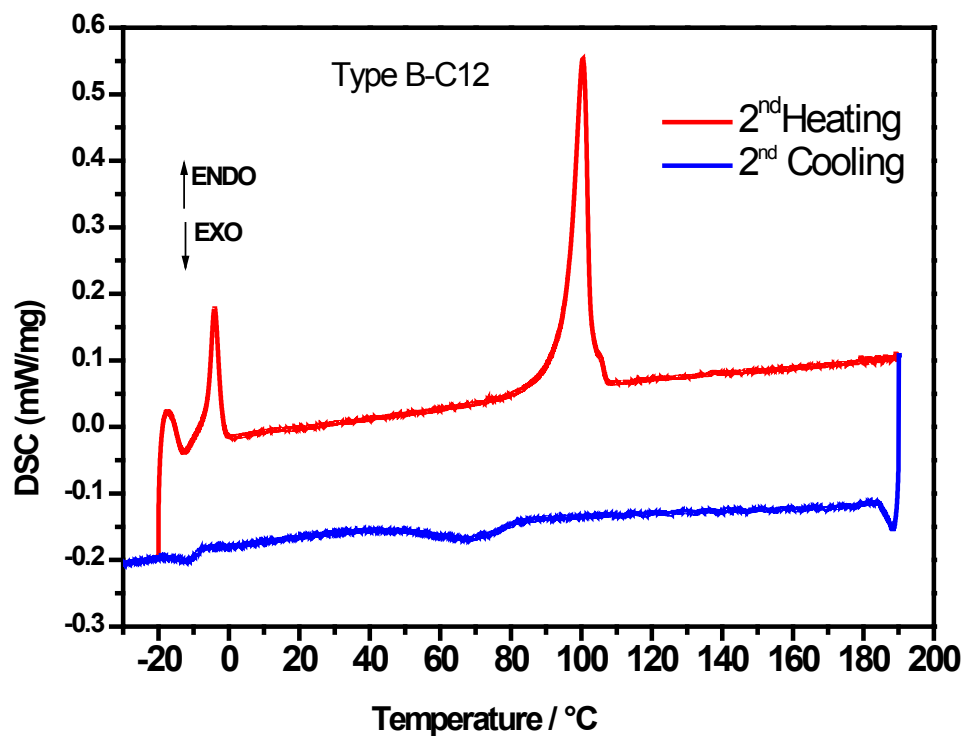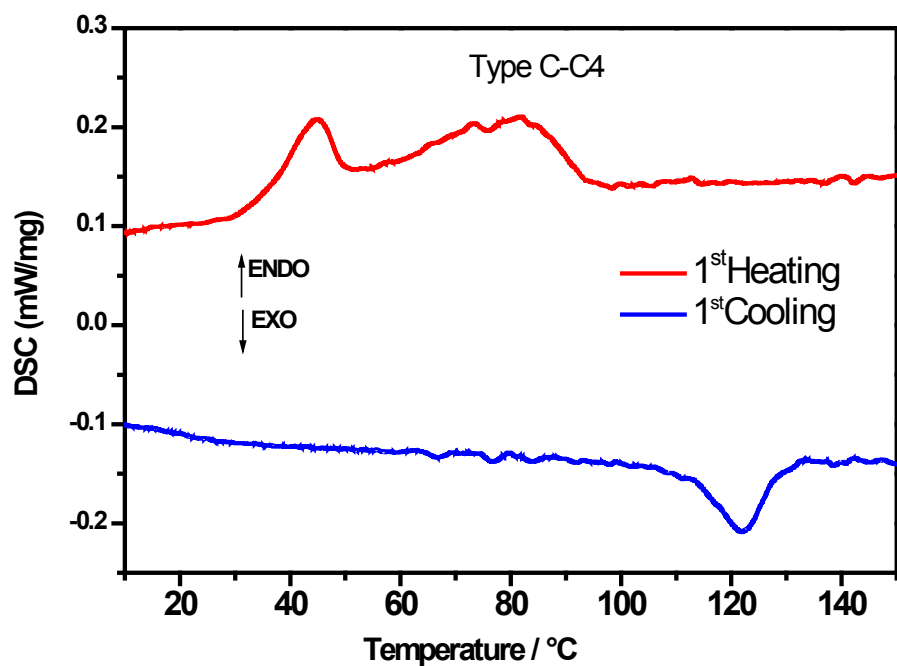

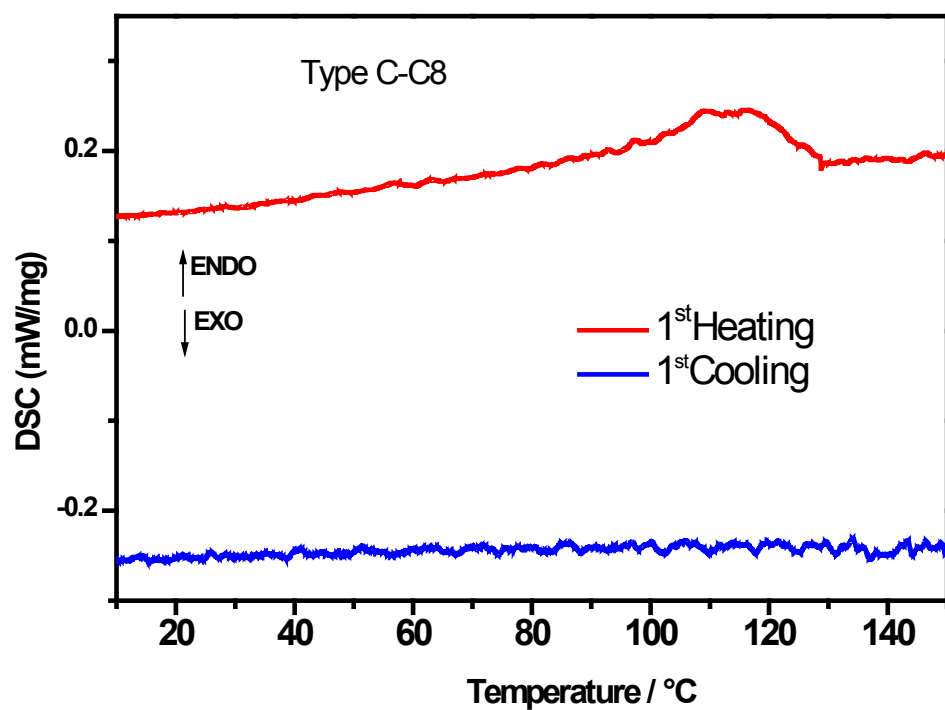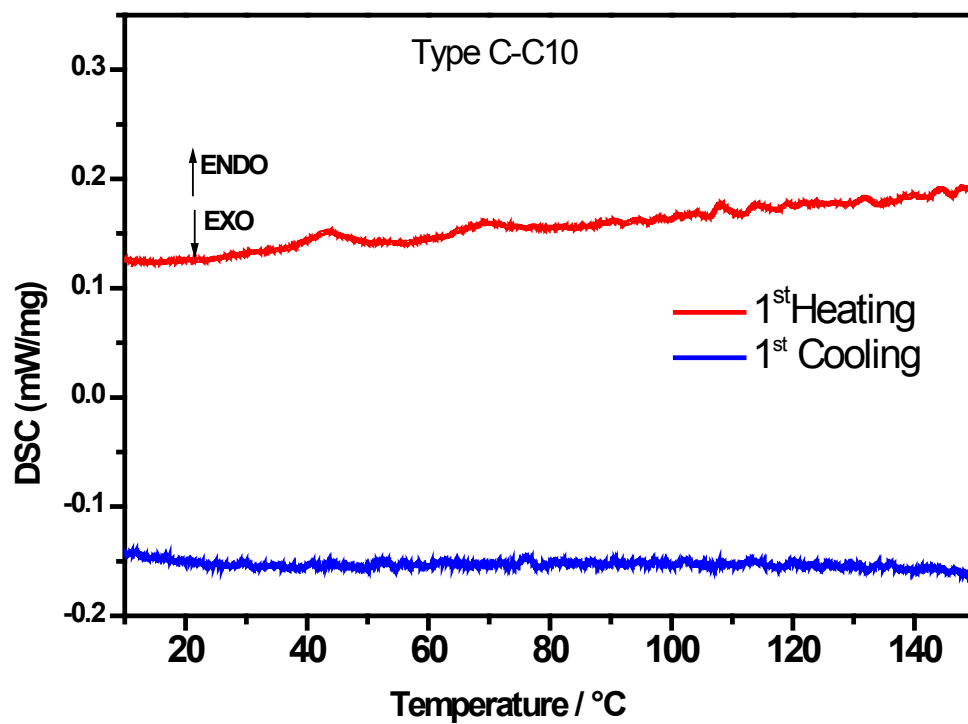

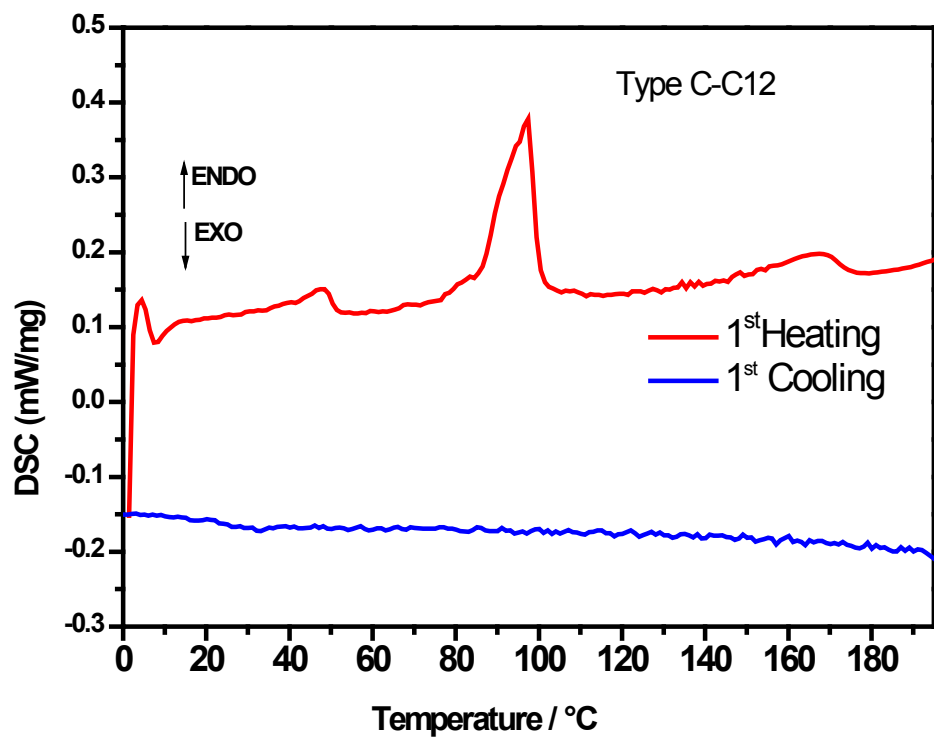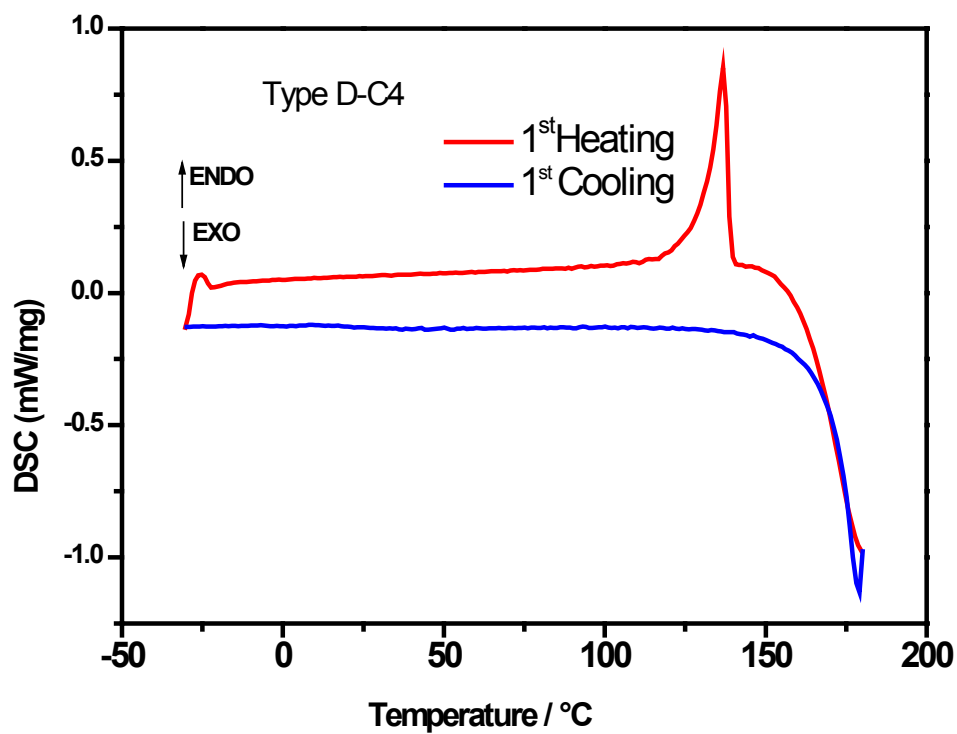

Electronic Supporting Information – Bis-cationic ionic liquid crystals – Yang, Stappert, Mudring

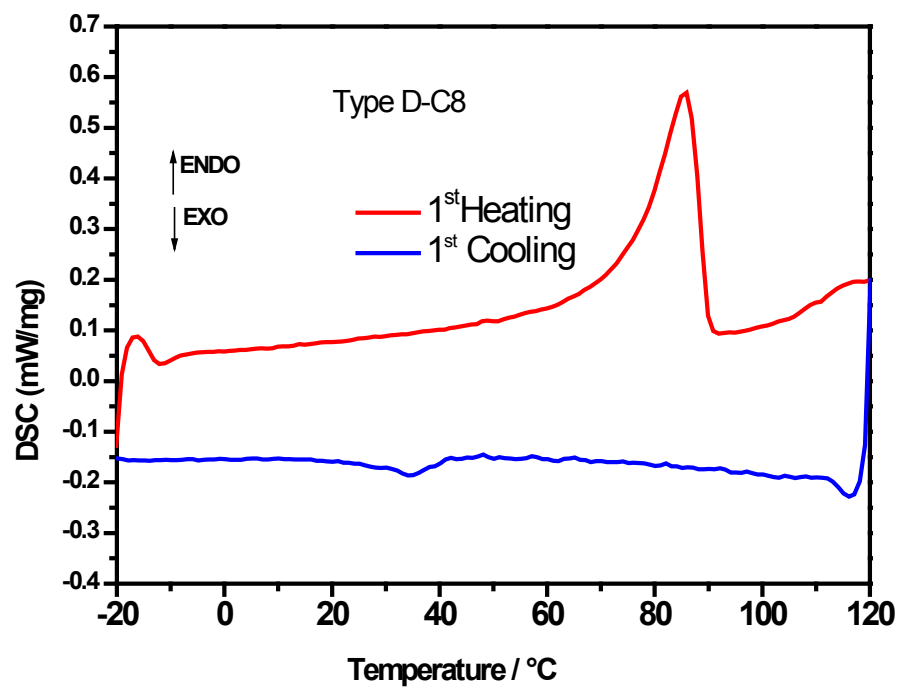

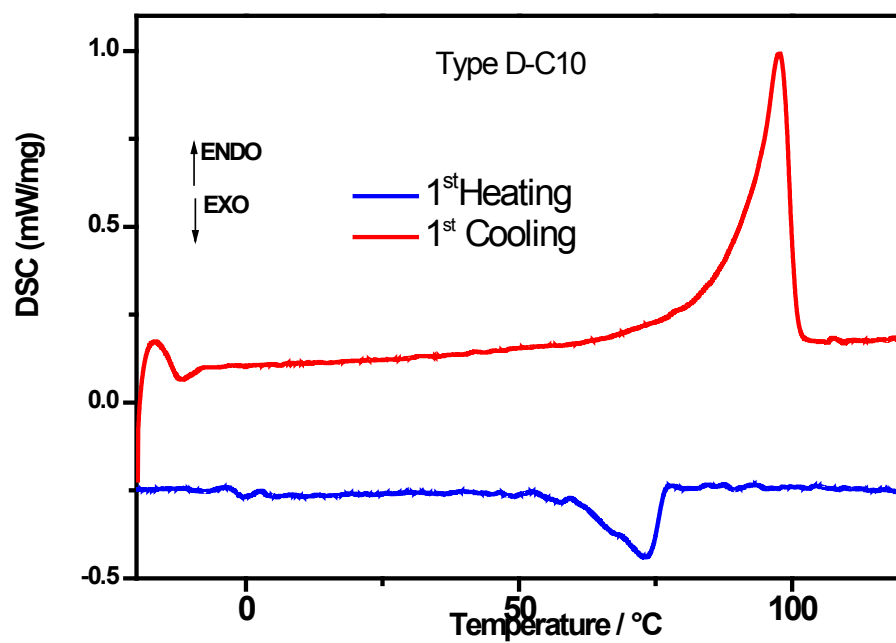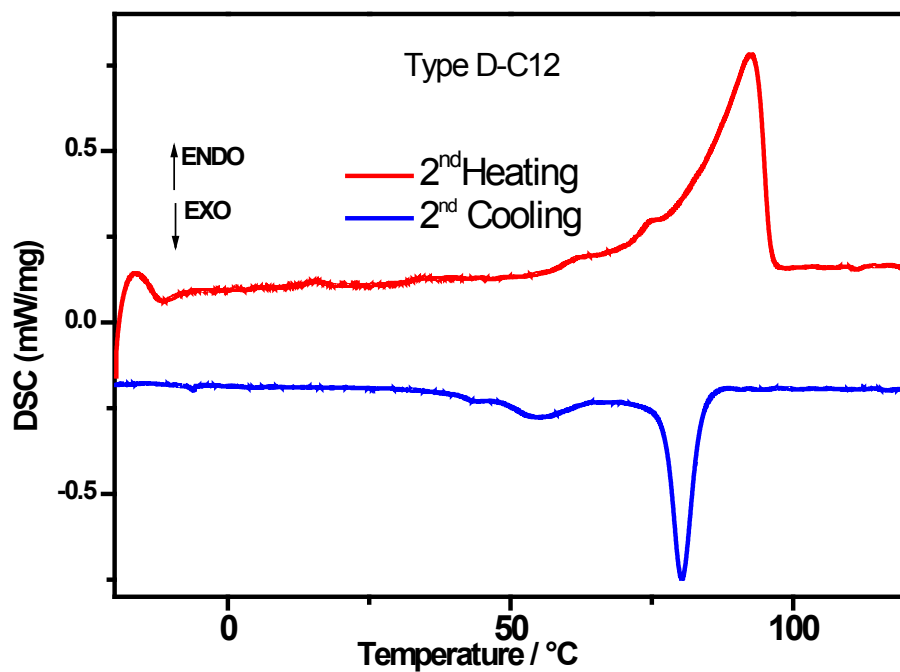

Electronic Supporting Information – Bis-cationic ionic liquid crystals – Yang, Stappert, Mudring

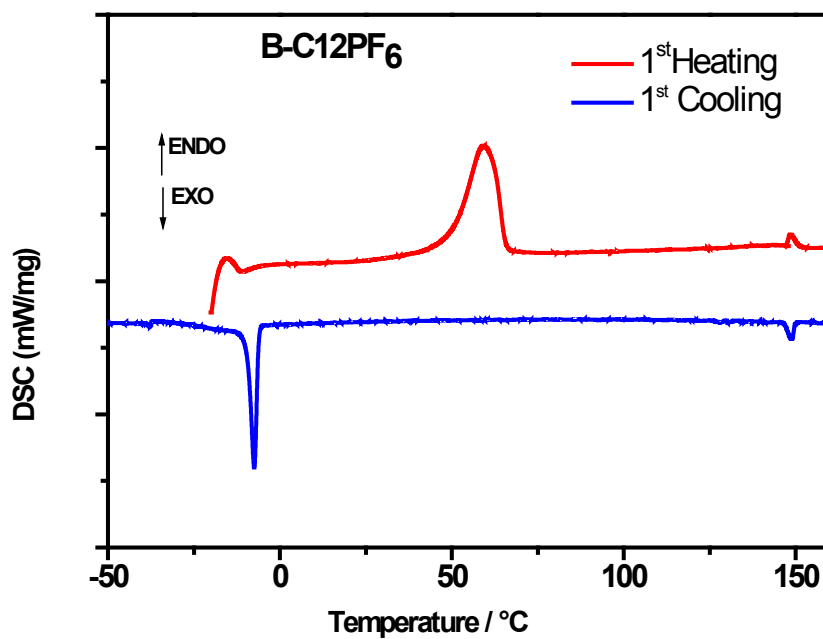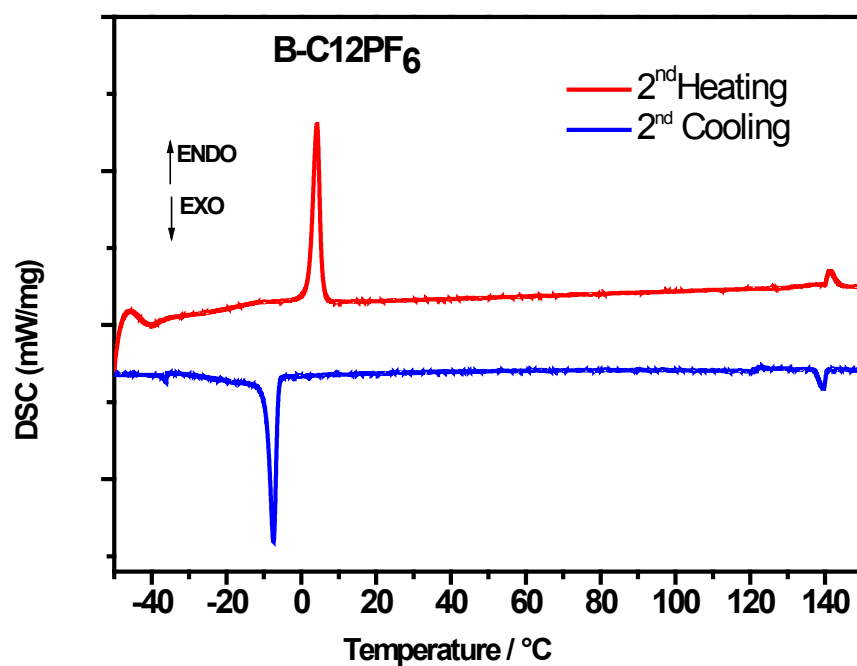

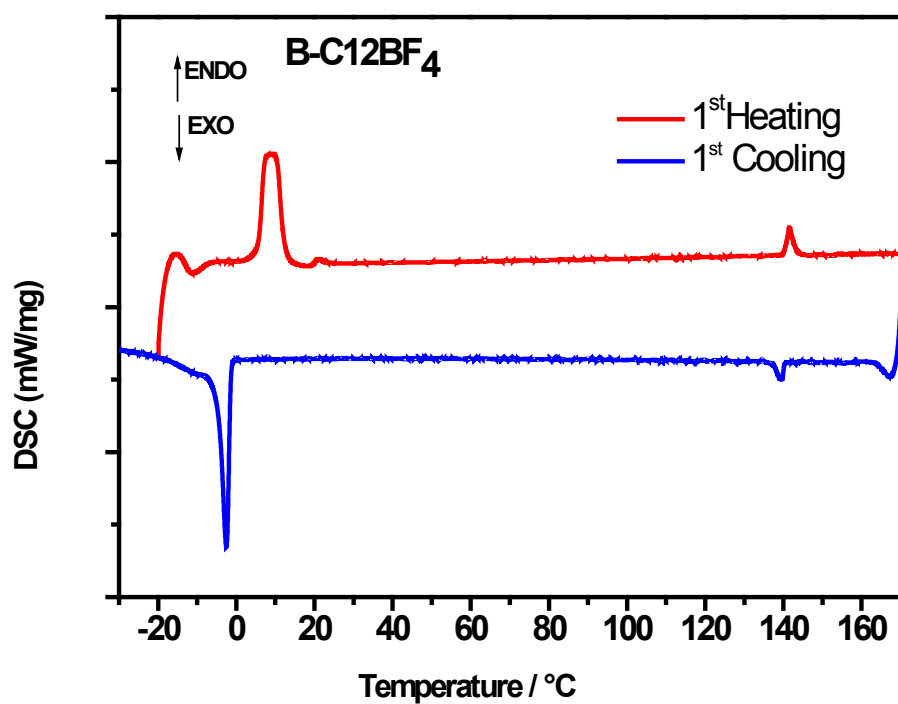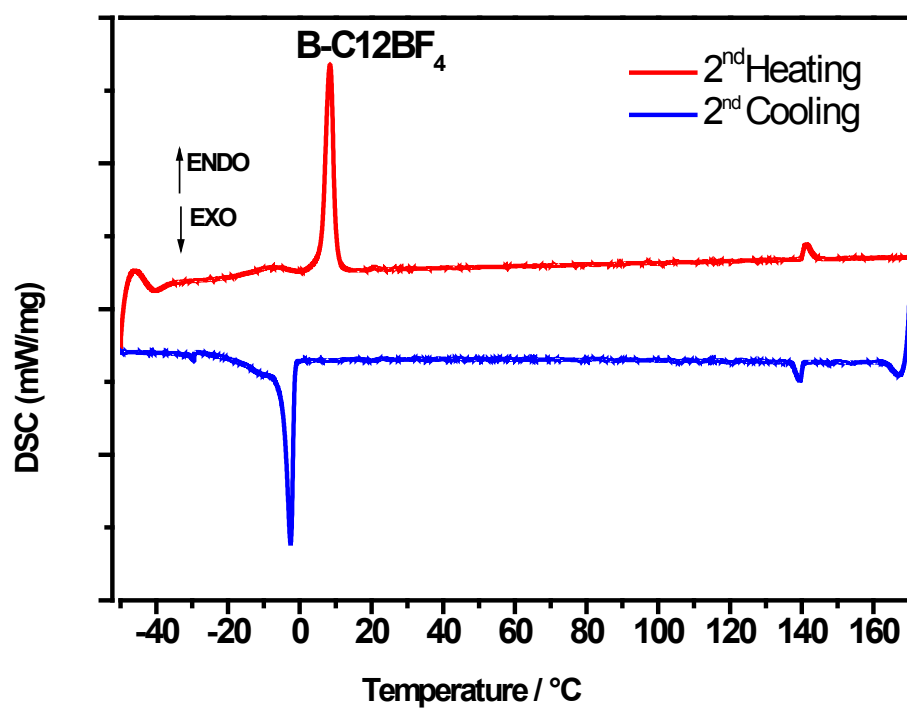

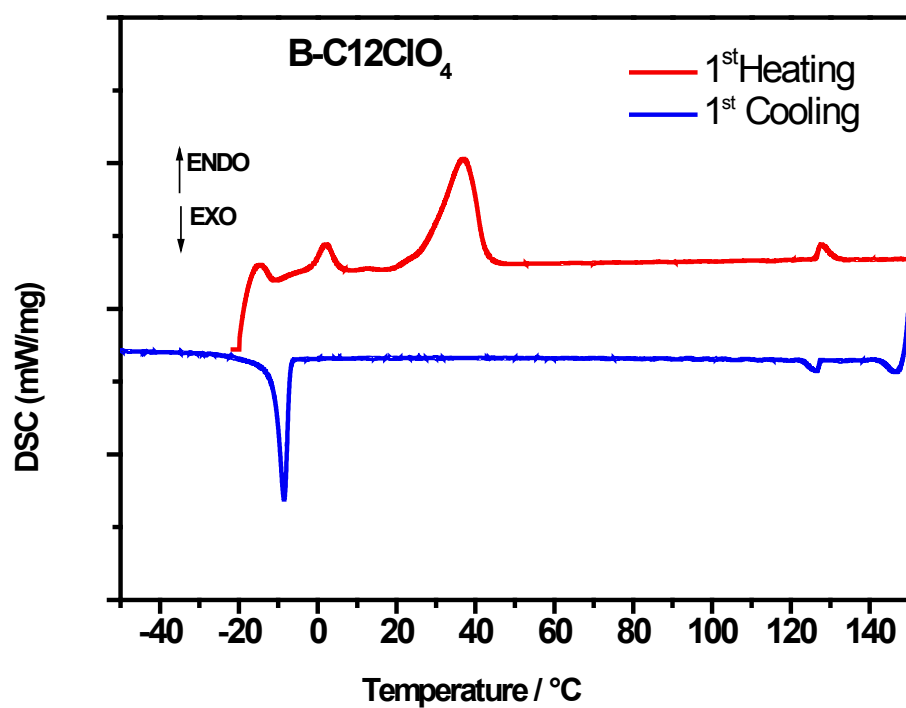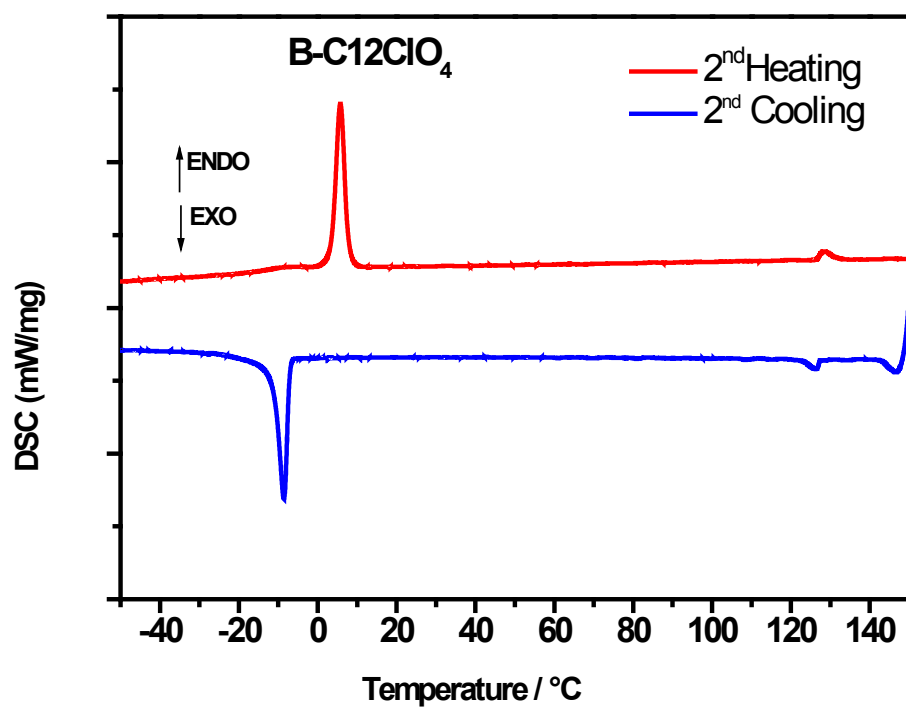



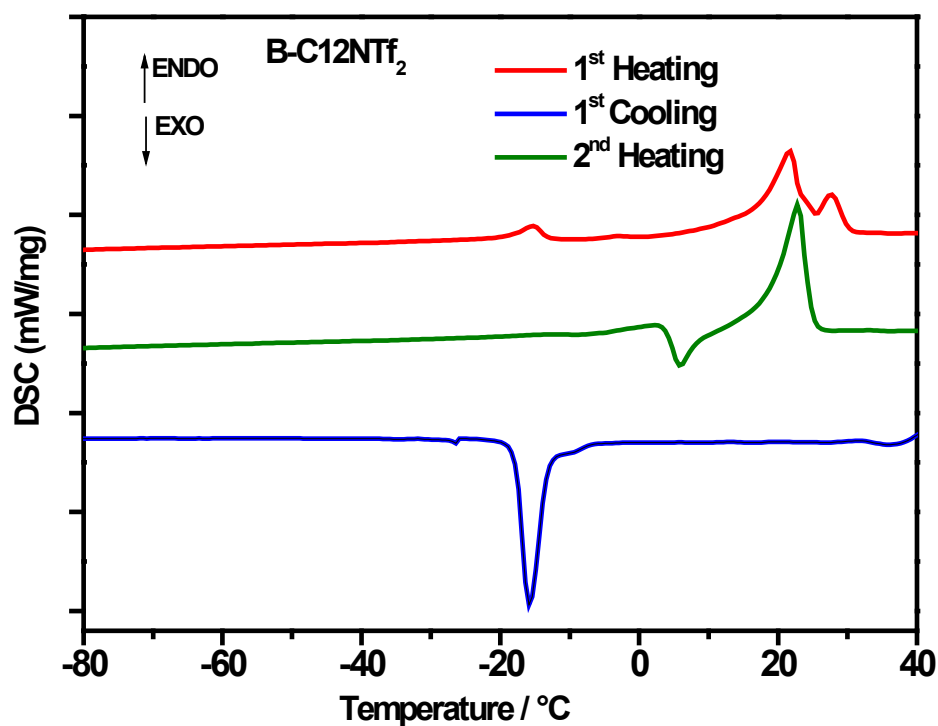

## SAXS

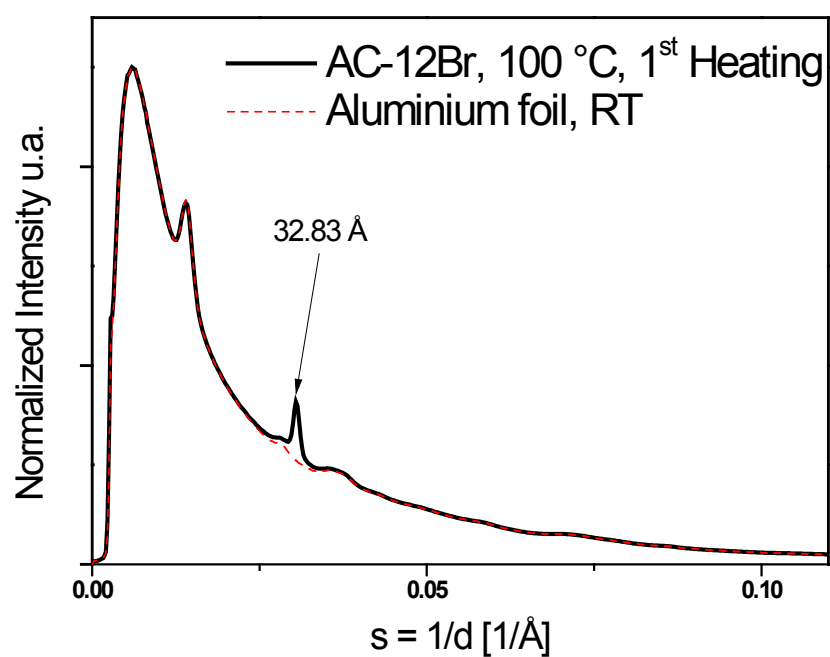

Electronic Supporting Information – Bis-cationic ionic liquid crystals – Yang, Stappert, Mudring

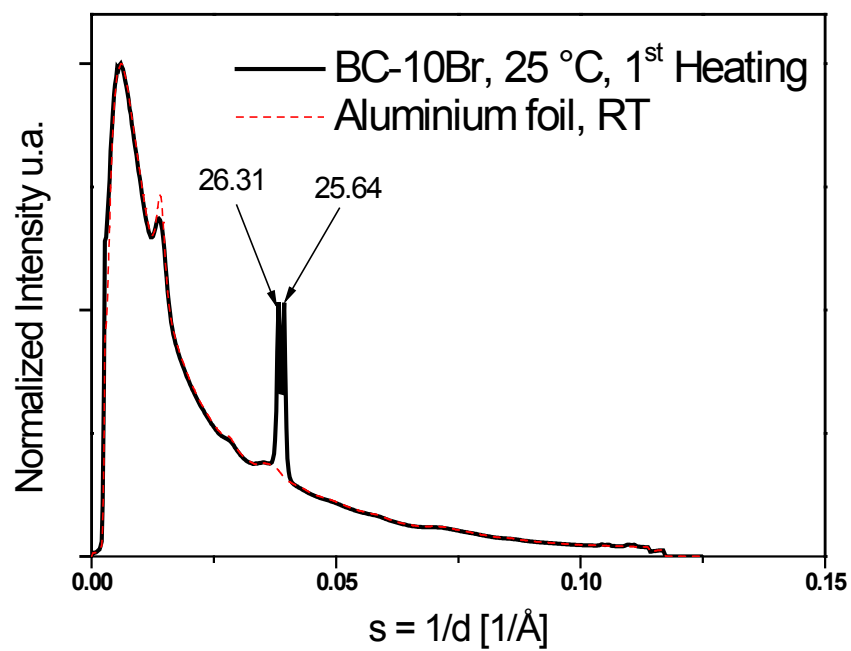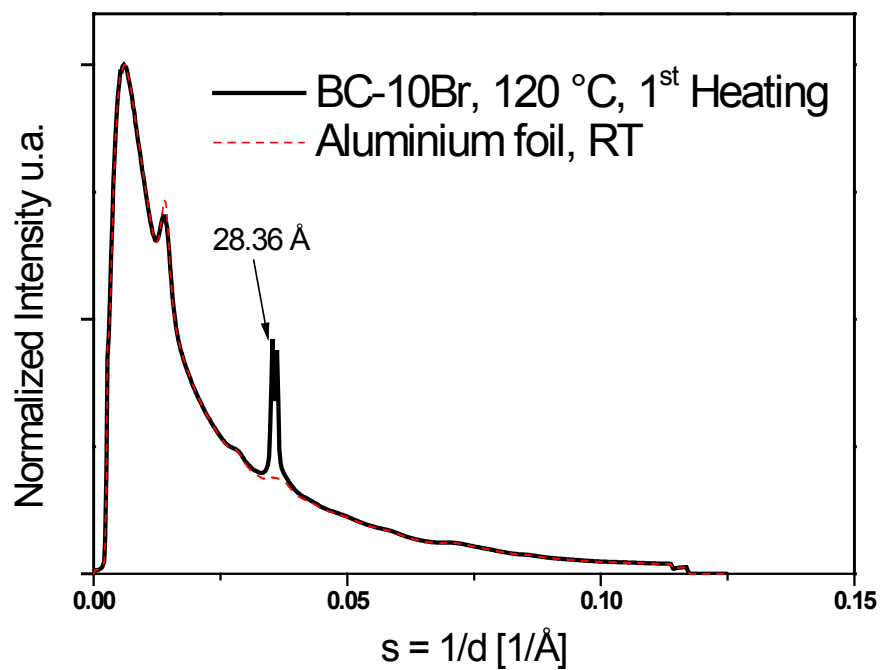

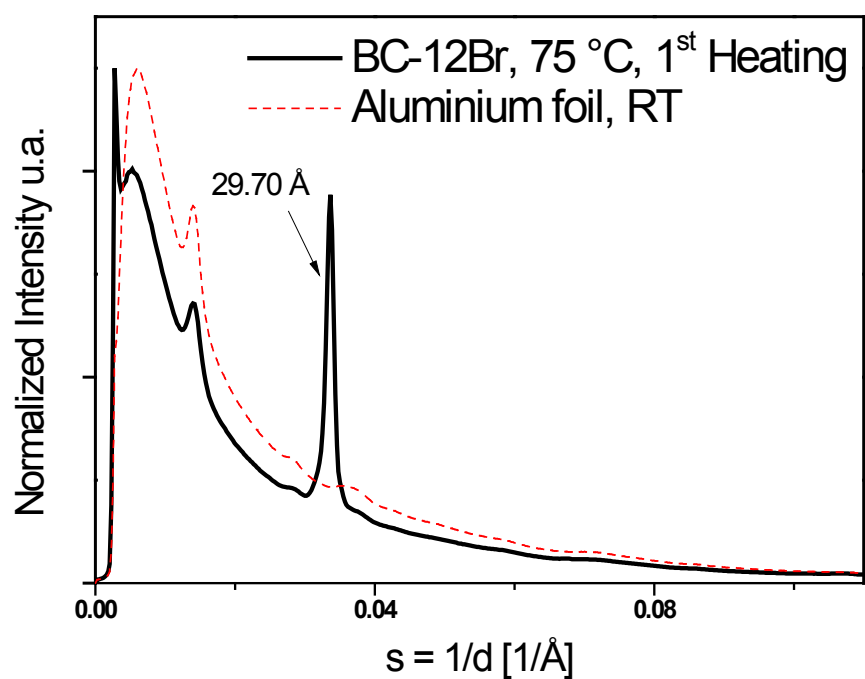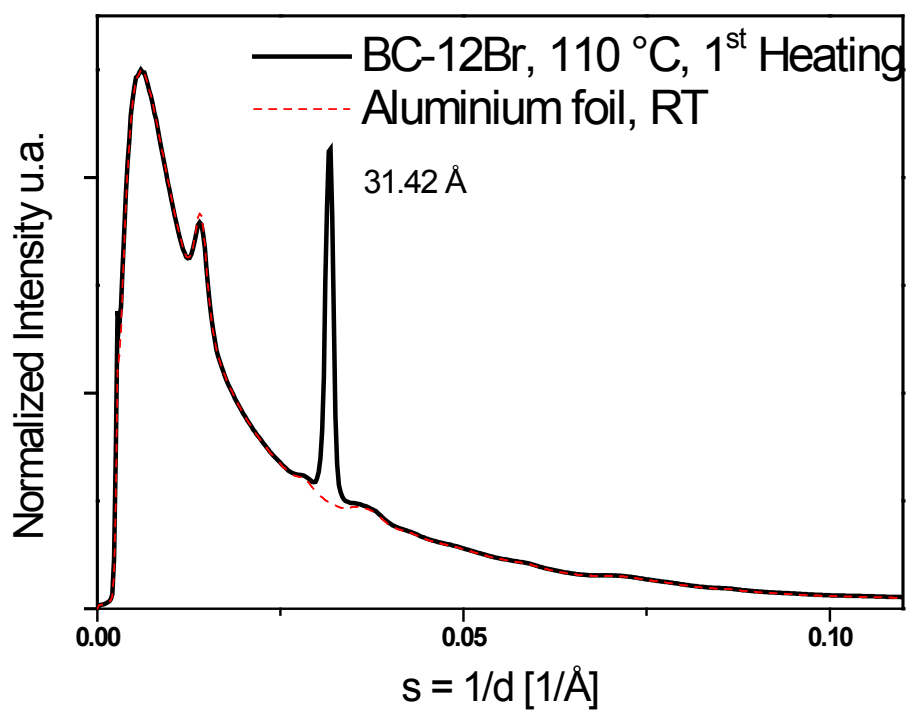

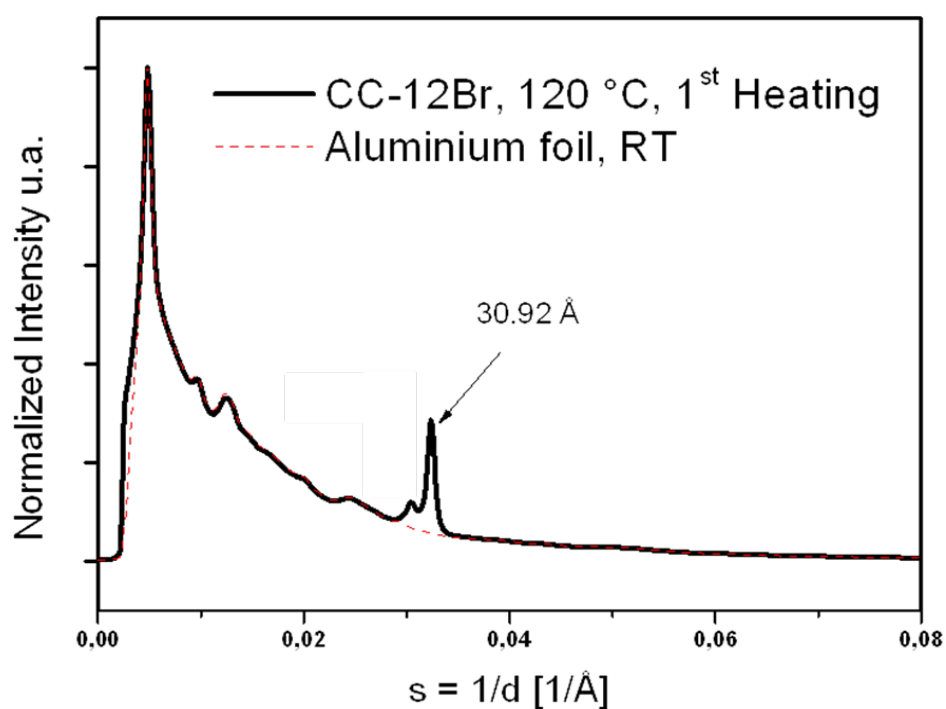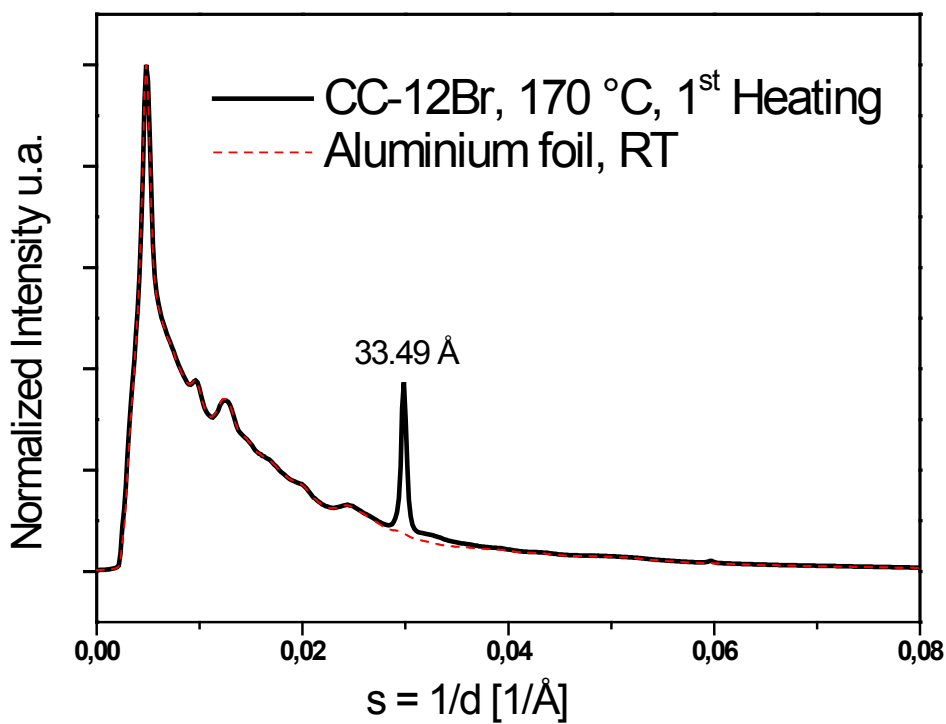

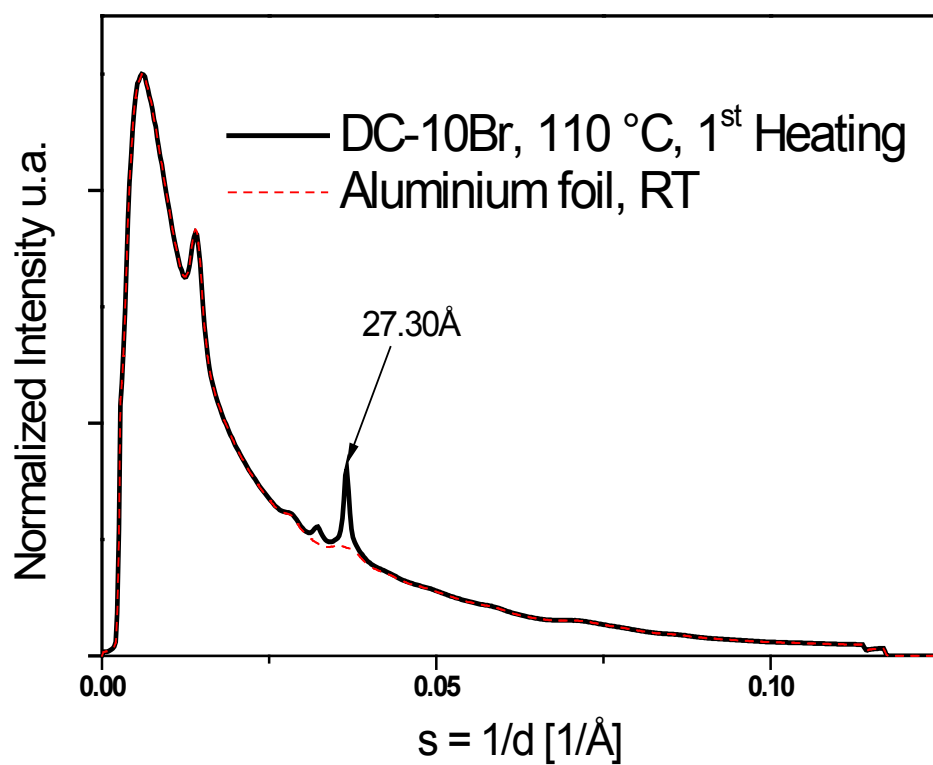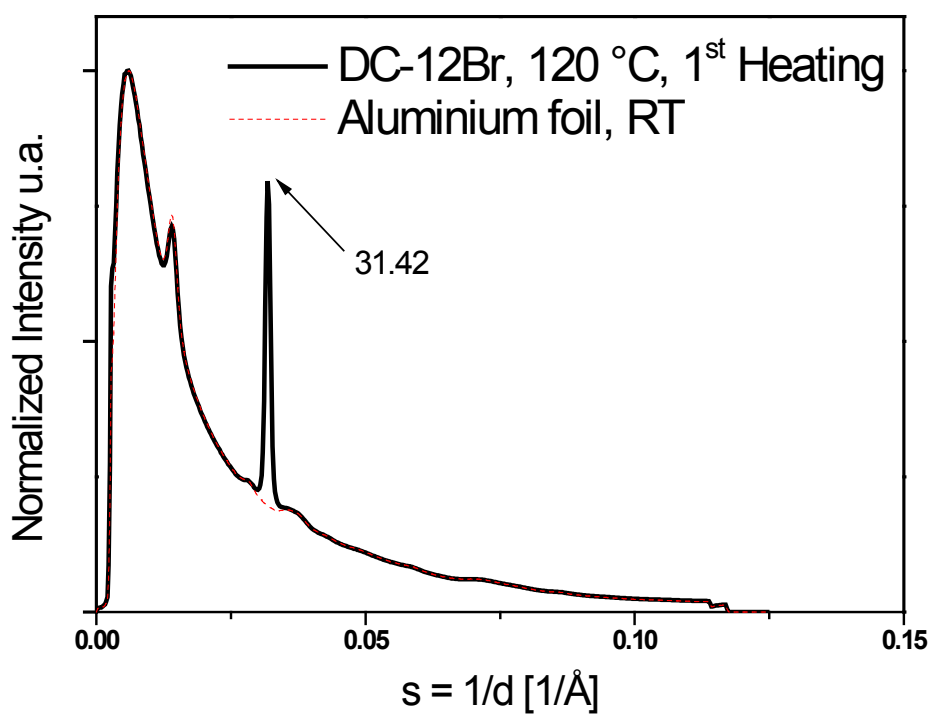

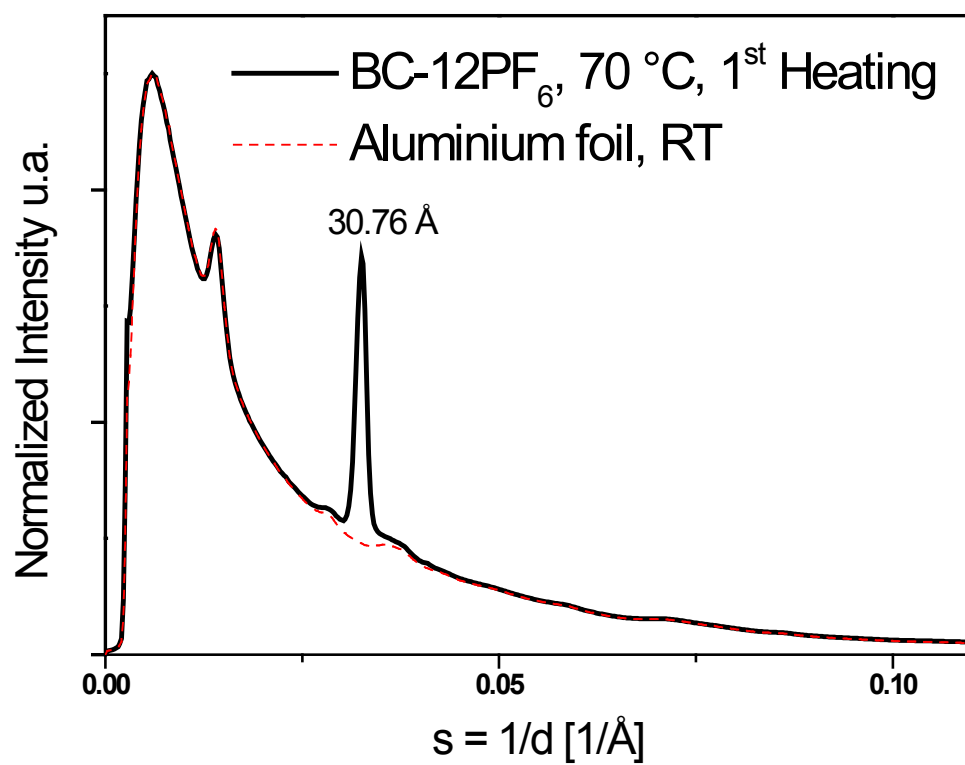

Supplement: c3tc31368a.pdf [file c3tc31368a.pdf]
